# Supplementary material
Source: PubMed Central journal article supplement (PMC7441777)
Supplement: TBSD_A_1796810_SM0875.pdf [file TBSD_A_1796810_SM0875.pdf]

## Supplementary Information

### **Plant-derived natural polyphenols as potential antiviral drugs against SARS-CoV-2 via RNA-dependent RNA polymerase (RdRp) inhibition: An *in-silico* analysis**

Satyam Singh<sup>1</sup>, Md Fulbabu Sk<sup>1</sup>, Avinash Sonawane<sup>1</sup>, Parimal Kar<sup>1</sup>, Sushabhan Sadhukhan<sup>2\*</sup>

<sup>1</sup>Discipline of Biosciences and Biomedical Engineering, Indian Institute of Technology Indore, Madhya Pradesh 453 552, India

<sup>2</sup>Discipline of Chemistry, Indian Institute of Technology Palakkad, Kerala 678 557, India

\*Corresponding author. *E-mail address*: [sushabhan@iitpkd.ac.in](mailto:sushabhan@iitpkd.ac.in) (S. Sadhukhan).

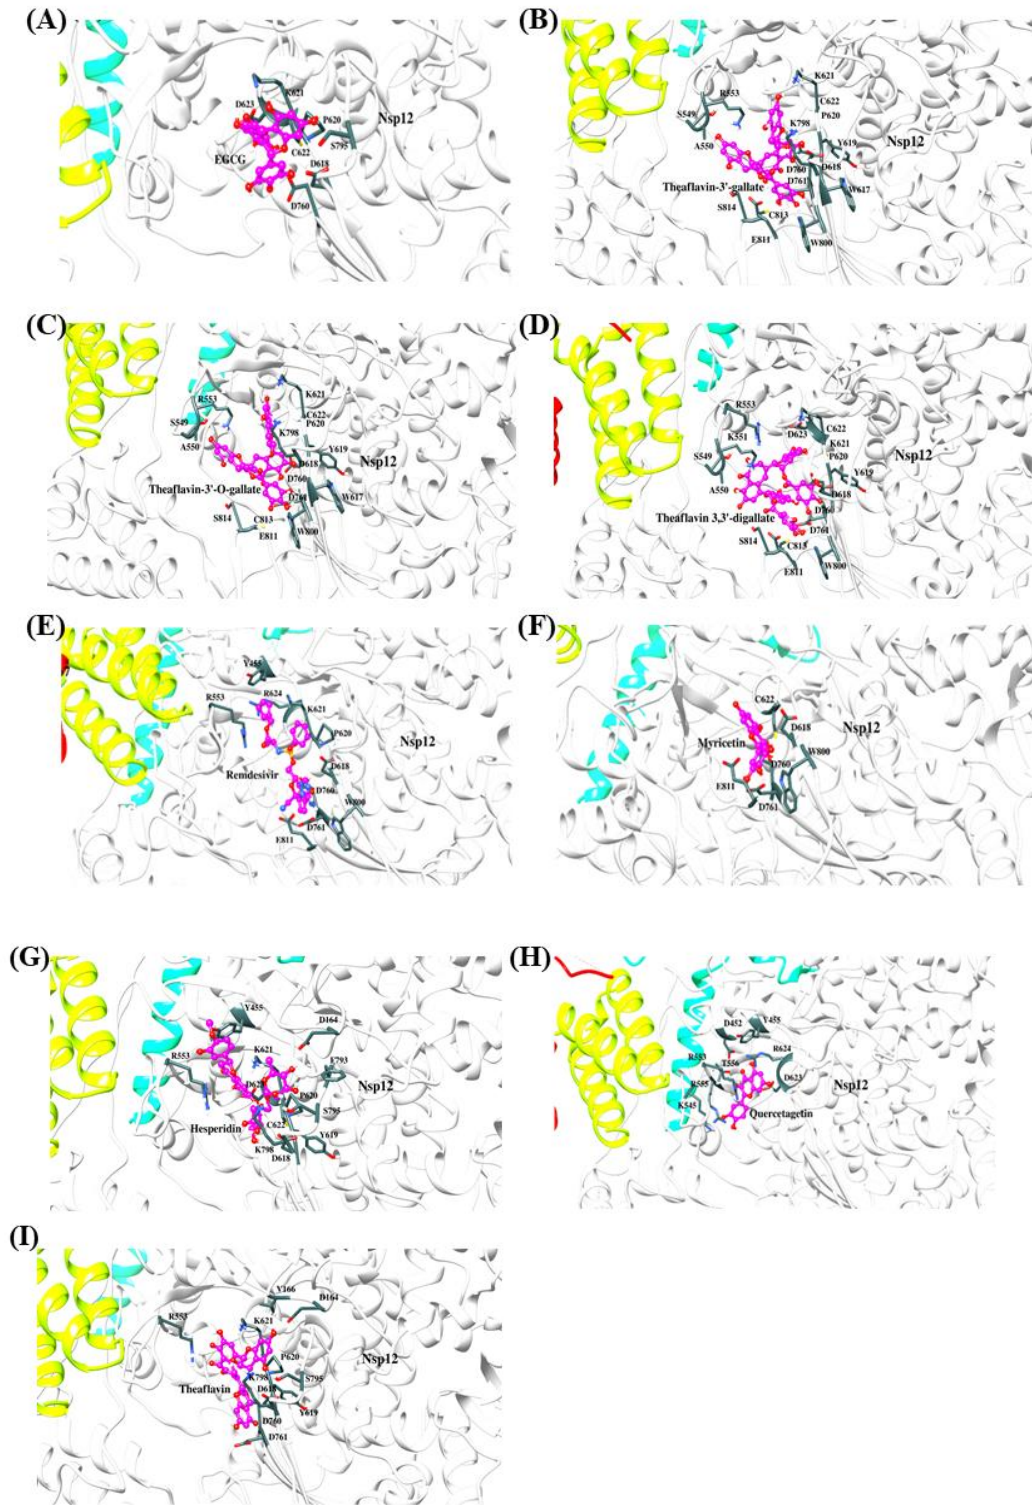

**Figure S1.** Best docked conformation of SARS-CoV-2 RdRp complexed with (A) EGCG, (B) TF2a, (C) TF2b, (D) TF3, (E) remdesivir, (F) myricetin, (G) hesperidin, (H) quercetagenin, (I) TF1.

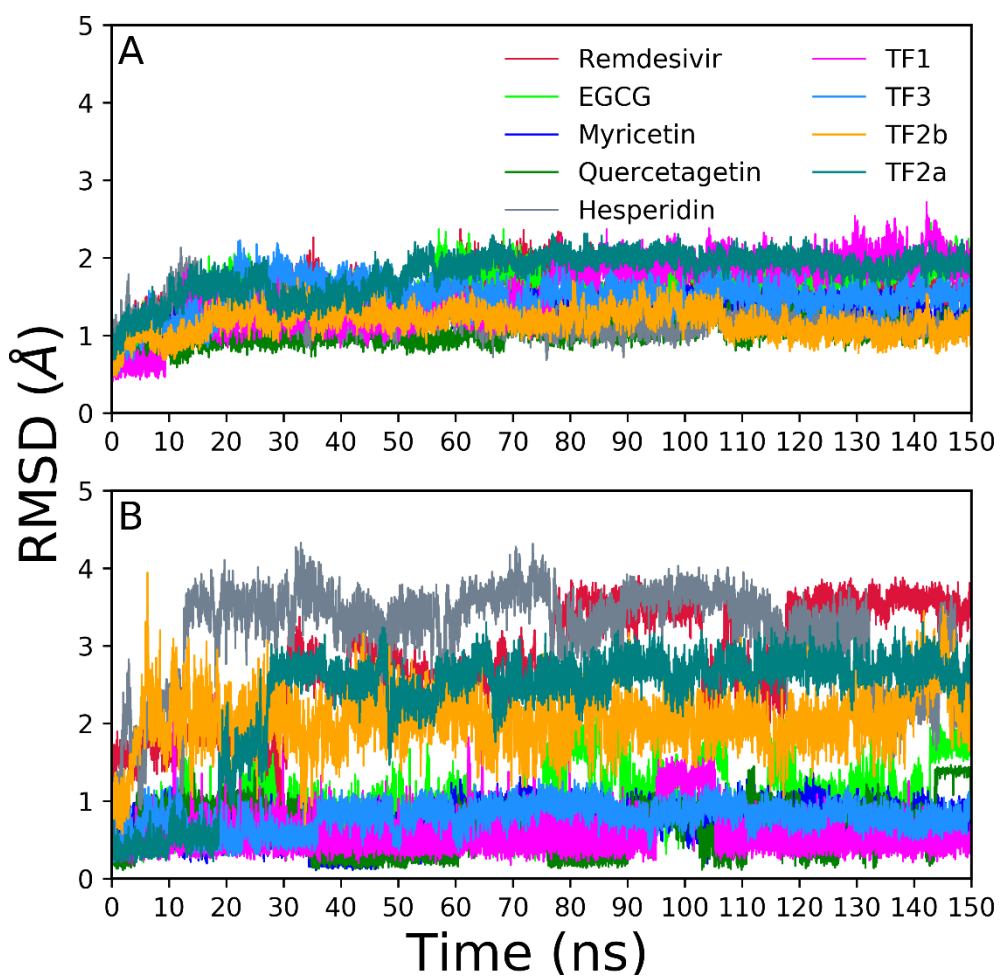

**Figure S2.** Time evolution of root-mean-square deviations (RMSDs) relative to their initial conformation of the RdRp complexes (**A**) for residue backbone atoms of binding pocket (5 Å around the ligand), and (**B**) for the ligands.

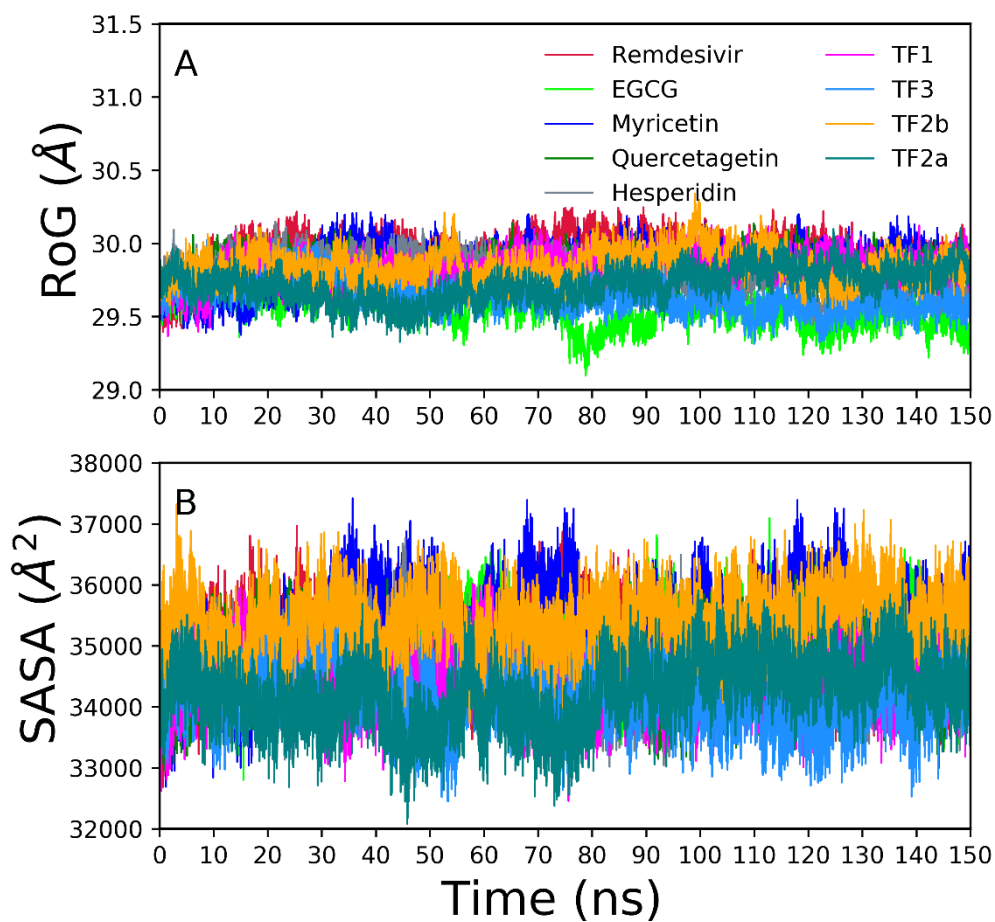

**Figure S3.** The time evolution of (A) the radius of gyration (RoG) and (B) solvent accessible surface area (SASA) of the RdRp complexes during MD simulations.

**Table S1.** Chemical structure and natural source for the hundred polyphenols selected for the current study.

| S. No. | Compound (PubChem CID No.) | Structure                                                                            | Common Sources              |
|--------|----------------------------|--------------------------------------------------------------------------------------|-----------------------------|
| 1      | EGCG (65064)               | 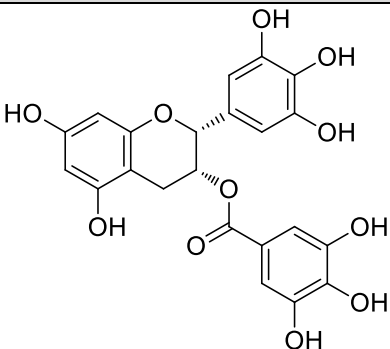   | <i>Camellia sinensis</i>    |
| 2      | Myricetin (5281672)        |   | <i>Myristica fragrans</i>   |
| 3      | Quercetin (5280343)        |  | <i>Azadirachta indica</i>   |
| 4      | Quercetagenin (5281680)    |  | <i>Eupatorium gracile</i>   |
| 5      | Robinetin (5280647)        |  | <i>Vaccinium corymbosum</i> |
| 6      | Isorhamnetin (5281654)     |  | <i>Solanum lycopersicum</i> |

|    |                              |                                                                                      |                                       |
|----|------------------------------|--------------------------------------------------------------------------------------|---------------------------------------|
| 7  | Curcumin<br>(969516)         | 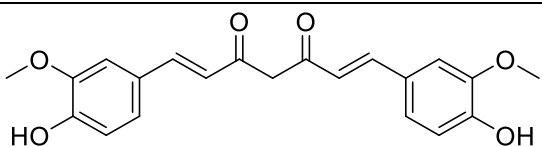   | <i>Curcuma longa</i>                  |
| 8  | Catechin<br>(73160)          |    | <i>Vitis vinifera</i>                 |
| 9  | 5-Deoxygalangin<br>(5393152) |    | <i>Spatholobus subrectus</i>          |
| 10 | Kaempferol<br>(5280863)      |    | <i>Brassica oleracea var. italica</i> |
| 11 | Genistein<br>(5280961)       |   | <i>Coffea arabica</i>                 |
| 12 | Apigenin<br>(5280443)        |  | <i>Camellia sinensis</i>              |
| 13 | Datisctin<br>(5281610)       |  | <i>Datisca cannabina</i>              |
| 14 | Baicalein<br>(5281605)       |  | <i>Scutellaria baicalensis</i>        |
| 15 | Luteolin<br>(5280445)        |  | <i>Bacopa moneirra</i>                |

|    |                                       |                                                                                      |                                 |
|----|---------------------------------------|--------------------------------------------------------------------------------------|---------------------------------|
| 16 | Tricetin<br>(5281701)                 | 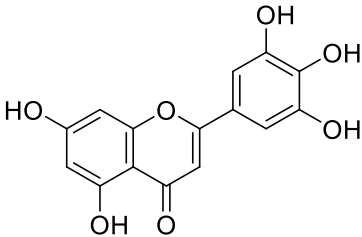   | <i>Eucalyptus globus</i>        |
| 17 | Galangin<br>(5281616)                 |    | <i>Alpinia officinarum</i>      |
| 18 | Gossypetin<br>(5280647)               |    | <i>Hibiscus sabdariffa</i>      |
| 19 | Morin<br>(5281670)                    |   | <i>Artocarpus heterophyllus</i> |
| 20 | Fisetin<br>(5281614)                  |  | <i>Rhus cotinus</i>             |
| 21 | Theaflavin<br>(135403798)             |  | <i>Camellia sinensis</i>        |
| 22 | Theaflavin-3'-O-gallate<br>(71307578) |  | <i>Camellia sinensis</i>        |

|    |                                           |                                                                                      |                             |
|----|-------------------------------------------|--------------------------------------------------------------------------------------|-----------------------------|
| 23 | Theaflavin 3'-gallate<br>(136825043)      | 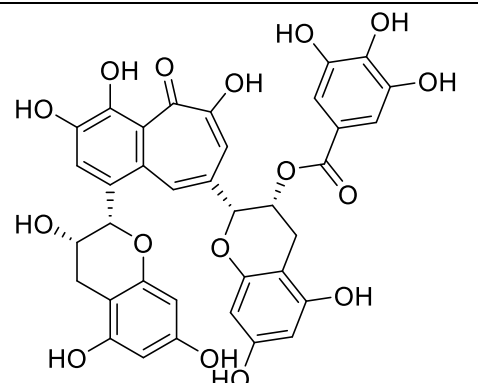   | <i>Camellia sinensis</i>    |
| 24 | Theaflavin 3, 3'-digallate<br>(135403795) |    | <i>Camellia sinensis</i>    |
| 25 | Hesperidin<br>(10621)                     |   | <i>Citrus medica</i>        |
| 26 | Dihydrorobinetin<br>(203990)              |  | <i>Vaccinium corymbosum</i> |
| 27 | Peonidin<br>(441773)                      |  | <i>Paeonia lactiflora</i>   |
| 28 | Butein<br>(5281222)                       |  | <i>Butea monosperma</i>     |
| 29 | Phloretin<br>(4788)                       |  | <i>Malus domestica</i>      |



|    |                                   |                                                                                      |                              |
|----|-----------------------------------|--------------------------------------------------------------------------------------|------------------------------|
| 30 | Isosakuranetin<br>(160481)        | 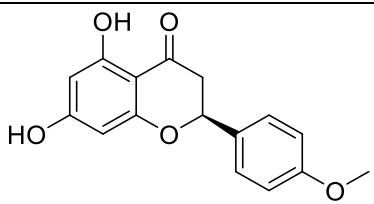   | <i>Salvia elegans</i>        |
| 31 | Coumestrol<br>(5281707)           |    | <i>Medicago sativa</i>       |
| 32 | 2-hydroxybenzoic acid<br>(450660) |     | <i>Catharanthus roseus</i>   |
| 33 | 3-hydroxybenzoic acid<br>(7420)   |     | <i>Catharanthus roseus</i>   |
| 34 | 4-hydroxybenzoic acid<br>(135)    |    | <i>Catharanthus roseus</i>   |
| 35 | Catechol<br>(289)                 |   | <i>Senegalia catechu</i>     |
| 36 | Pyrogallol<br>(1057)              |   | <i>Myriophyllum spicatum</i> |
| 37 | Tyrosol<br>(10393)                |  | <i>Olea europaea</i>         |
| 38 | 4-ethylphenol<br>(31242)          |   | <i>Larrea divaricata</i>     |
| 39 | Angolensin<br>(3584988)           |  | <i>Trifolium pratense</i>    |
| 40 | Dalbergin<br>(442768)             |   | <i>Mesua thwaitesii</i>      |
| 41 | Vanillin<br>(1183)                |   | <i>Vanillia planifolia</i>   |

|    |                             |                                                                                      |                               |
|----|-----------------------------|--------------------------------------------------------------------------------------|-------------------------------|
| 42 | Danshensu<br>(11600642)     | 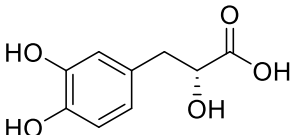   | <i>Salvia clandestina</i>     |
| 43 | Urolithin A<br>(5488186)    |    | <i>Punica grantum</i>         |
| 44 | Urolithin B<br>(5380406)    |     | <i>Punica grantum</i>         |
| 45 | Paeonol<br>(11092)          |     | <i>Paeonia suffruticosa</i>   |
| 46 | Resacetophenone<br>(6990)   |    | <i>Cistus monspeliensis</i>   |
| 47 | Norathyriol<br>(5281656)    |  | <i>Gracinia mangostana</i>    |
| 48 | Isoferulic acid<br>(736186) |  | <i>Capsicum annuum</i>        |
| 49 | Rhapontigenin<br>(5320954)  |  | <i>Vitis coignetiae</i>       |
| 50 | Pterostilbene<br>(5281727)  |  | <i>Pterocarpus marsupium</i>  |
| 51 | Pinosylvin<br>(5280457)     |  | <i>Gnetum cliestostachyum</i> |

|    |                                |                                                                                      |                                |
|----|--------------------------------|--------------------------------------------------------------------------------------|--------------------------------|
| 52 | Piceatannol<br>(667639)        | 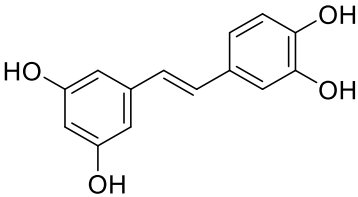   | <i>Laburnum anagyroides</i>    |
| 53 | Isorhapontigenin<br>(5318650)  |    | <i>Vitis coignetiae</i>        |
| 54 | Formononetin<br>(5280378)      |    | <i>Trifolium pratense</i>      |
| 55 | Biochanin A<br>(528073)        |    | <i>Medicago sativa</i>         |
| 56 | Biochanin (1-) A<br>(25203224) |   | <i>Medicago sativa</i>         |
| 57 | Alpinetin<br>(154279)          |  | <i>Alpinia katsumadai</i>      |
| 58 | Hispidulin<br>(5281628)        |  | <i>Grindelia argentina</i>     |
| 59 | R-(+) Equol<br>(6950272)       |  | <i>Pueraria mirifica</i>       |
| 60 | Prunetin<br>(5281804)          |  | <i>Prunus emarginata</i>       |
| 61 | Wogonin<br>(5281703)           |  | <i>Scutellaria baicalensis</i> |

|    |                             |                                                                                      |                               |
|----|-----------------------------|--------------------------------------------------------------------------------------|-------------------------------|
| 62 | Purpurin<br>(6683)          | 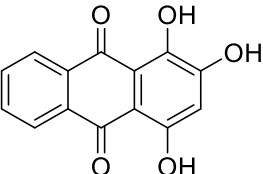   | <i>Tephrosia purpurea</i>     |
| 63 | Pectolarigenin<br>(5320438) |    | <i>Clerodendrum phlomidis</i> |
| 64 | Pelargonidin<br>(440832)    |    | <i>Rubus fruticosus</i>       |
| 65 | Malvidin<br>(159287)        |    | <i>Vitis vinifera</i>         |
| 66 | Pratensein<br>(5281803)     |  | <i>Trifolium pratense</i>     |
| 67 | Nobiletin<br>(72344)        |  | <i>Citrus reticulata</i>      |
| 68 | Kaempferide<br>(5281666)    |  | <i>Acalypha indica</i>        |
| 69 | Pinobanksin<br>(73202)      |  | <i>Populus nigra</i>          |
| 70 | Pinocembrin<br>(68071)      |  | <i>Populus nigra</i>          |

|    |                                    |                                                                                      |                           |
|----|------------------------------------|--------------------------------------------------------------------------------------|---------------------------|
| 71 | Pinostrobin<br>(73201)             |                                                                                      | <i>Populus nigra</i>      |
| 72 | Liquiritigenin<br>(114829)         | 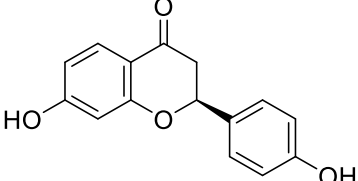   | <i>Glycyrrhiza glabra</i> |
| 73 | 5-hydroxyflavone<br>(68112)        |     | <i>Barleria prionitis</i> |
| 74 | 6-hydroxyflavone<br>(72279)        |    | <i>Barleria prionitis</i> |
| 75 | Acacetin<br>(5280442)              |   | <i>Ammi visnaga</i>       |
| 76 | Fustin<br>(5317435)                |  | <i>Cotinus coggygia</i>   |
| 77 | (-) Epicatechin<br>(72276)         |  | <i>Camellia sinensis</i>  |
| 78 | Dihydro-caffeic acid<br>(15847196) |  | <i>Coffea arabica</i>     |
| 79 | Glycitein<br>(5317750)             |  | <i>Trifolium pratense</i> |
| 80 | Daidzein<br>(5281708)              |  | <i>Pueraria mirifica</i>  |

|    |                                    |                                                                                      |                             |
|----|------------------------------------|--------------------------------------------------------------------------------------|-----------------------------|
| 81 | 4-hydroxycinnamic acid<br>(637542) | 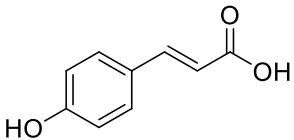   | <i>Artemisia vulgaris</i>   |
| 82 | Cinnamic acid<br>(444539)          |     | <i>Artemisia vulgaris</i>   |
| 83 | Eugenin<br>(10189)                 |     | <i>Rosa damascena</i>       |
| 84 | Syringic acid<br>(10742)           |     | <i>Larrea divaricata</i>    |
| 85 | Gentisic acid<br>(3469)            |     | <i>Alchornea cordifolia</i> |
| 86 | P-coumeric acid<br>(1549106)       |   | <i>Larrea divaricata</i>    |
| 87 | Sinapic acid<br>(637775)           |  | <i>Arabidopsis thaliana</i> |
| 88 | Ferulic acid<br>(445858)           |  | <i>Capsicum annum</i>       |
| 89 | Caffeic acid<br>(689043)           |  | <i>Beta vulgaris</i>        |
| 90 | Salicylic acid<br>(338)            |   | <i>Catharanthus roseus</i>  |
| 91 | Vanillic acid<br>(8468)            |   | <i>Catharanthus roseus</i>  |
| 92 | Protocatechuic acid<br>(72)        |   | <i>Prunus amygdalus</i>     |

|     |                           |                                                                                      |                                |
|-----|---------------------------|--------------------------------------------------------------------------------------|--------------------------------|
| 93  | Gallic acid<br>(370)      | 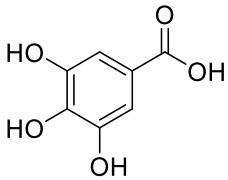    | <i>Terminalia chebula</i>      |
| 94  | Cyanidin<br>(128861)      |    | <i>Prunus avium</i>            |
| 95  | Chrysin<br>(5281607)      |    | <i>Oroxylum indicum</i>        |
| 96  | Tangeritin<br>(68077)     |    | <i>Citrus sinensis</i>         |
| 97  | Naringenin<br>(932)       |   | <i>Citrus sinensis</i>         |
| 98  | Scutellarein<br>(5281697) |  | <i>Scutellaria baicalensis</i> |
| 99  | Resveratrol<br>(445154)   |  | <i>Vitis vinifera</i>          |
| 100 | Irilone<br>(5281779)      |  | <i>Trifolium pratense</i>      |

**Table S2.** Energetic components of the binding free energy of RdRp and natural polyphenols along with remdesivir complexes in kcal/mol. Data are represented as average  $\pm$  SEM.

| <b>Components</b>                                | <b>Myricetin</b>  | <b>Quercetagetin</b> | <b>Hesperidin</b> | <b>TF1</b>        | <b>Remdesivir</b>  |
|--------------------------------------------------|-------------------|----------------------|-------------------|-------------------|--------------------|
| $\Delta E_{\text{vdW}}$                          | $-29.13 \pm 0.29$ | $-18.81 \pm 0.33$    | $-33.54 \pm 0.14$ | $-28.28 \pm 0.27$ | $-31.85 \pm 0.15$  |
| $\Delta E_{\text{elec}}$                         | $-21.37 \pm 0.84$ | $-43.11 \pm 1.10$    | $-32.60 \pm 0.65$ | $-29.41 \pm 0.46$ | $-98.40 \pm 0.70$  |
| $\Delta G_{\text{pol}}$                          | $37.45 \pm 0.45$  | $51.27 \pm 0.75$     | $54.20 \pm 0.70$  | $47.49 \pm 0.50$  | $109.97 \pm 0.57$  |
| $\Delta G_{\text{np}}$                           | $-3.16 \pm 0.00$  | $-2.83 \pm 0.00$     | $-4.31 \pm 0.00$  | $-3.19 \pm 0.00$  | $-4.29 \pm 0.01$   |
| $\Delta G_{\text{solv}}^{\text{a}}$              | $34.29 \pm 0.45$  | $48.44 \pm 0.75$     | $49.89 \pm 0.70$  | $44.30 \pm 0.50$  | $105.68 \pm 0.57$  |
| $\Delta G_{\text{pol} + \text{elec}}^{\text{b}}$ | $16.08 \pm 0.95$  | $8.16 \pm 1.33$      | $21.60 \pm 0.95$  | $18.08 \pm 0.67$  | $11.57 \pm 0.90$   |
| $\Delta E_{\text{MM}}^{\text{c}}$                | $-50.50 \pm 0.88$ | $-61.92 \pm 1.14$    | $-66.14 \pm 0.66$ | $-57.69 \pm 0.53$ | $-130.25 \pm 0.71$ |
| $\Delta G_{\text{bind}}^{\text{sim}}$            | $-16.21 \pm 0.98$ | $-13.48 \pm 1.36$    | $-16.25 \pm 0.96$ | $-13.39 \pm 0.72$ | $-24.57 \pm 0.91$  |

<sup>a</sup> $\Delta G_{\text{solv}} = \Delta G_{\text{np}} + \Delta G_{\text{pol}}$ , <sup>b</sup> $\Delta G_{\text{pol} + \text{elec}} = \Delta E_{\text{elec}} + \Delta G_{\text{pol}}$ , <sup>c</sup> $\Delta E_{\text{MM}} = \Delta E_{\text{vdW}} + \Delta E_{\text{elec}}$ .



**Table S3.** Predicted absorption properties of remdesivir, EGCG, TF2a, TF2b and TF3

| <b>Properties</b>                                  | <b>Remdesivir</b> | <b>EGCG</b> | <b>TF2a</b> | <b>TF2b</b> | <b>TF3</b> |
|----------------------------------------------------|-------------------|-------------|-------------|-------------|------------|
| Water solubility<br>log mol/L                      | -3.07             | -2.894      | -2.892      | -2.892      | -2.892     |
| Caco2<br>permeability<br>Log 10 <sup>-6</sup> cm/s | 0.635             | -1.521      | 0.027       | -1.293      | -1.643     |
| Human intestinal<br>absorption (%)                 | 71.109            | 47.395      | 50.555      | 37.409      | 36.043     |
| Skin<br>permeability log<br>Kp                     | -2.735            | -2.735      | -2.735      | -2.735      | -2.735     |
| P-glycoprotein<br>substrate                        | Yes               | Yes         | Yes         | Yes         | Yes        |
| P-glycoprotein I<br>inhibitor                      | Yes               | No          | Yes         | Yes         | No         |
| P-glycoprotein II<br>inhibitor                     | No                | Yes         | Yes         | Yes         | Yes        |

**Table S4.** Predicted distribution properties of remdesivir, EGCG, TF2a, TF2b and TF3

| <b>Properties</b>                | <b>Remdesivir</b> | <b>EGCG</b> | <b>TF2a</b> | <b>TF2b</b> | <b>TF3</b> |
|----------------------------------|-------------------|-------------|-------------|-------------|------------|
| VDss (log L/kg)                  | 0.307             | 0.806       | 0.742       | -0.021      | -0.088     |
| Fraction unbound<br>(human) (Fu) | 0.005             | 0.215       | 0.22        | 0.319       | 0.371      |
| BBB<br>permeability (log<br>BB)  | -2.056            | -2.184      | -2.092      | -2.665      | -3.442     |
| CNS permeability<br>(log PS)     | -4.675            | -3.96       | -4.159      | -4.406      | -5.115     |

**Table S5.** Predicted metabolic fates of remdesivir, EGCG, TF2a, TF2b and TF3

| <b>Properties</b> | <b>Remdesivir</b> | <b>EGCG</b> | <b>TF2a</b> | <b>TF2b</b> | <b>TF3</b> |
|-------------------|-------------------|-------------|-------------|-------------|------------|
| CYP2D6 substrate  | No                | No          | No          | No          | No         |
| CYP3A4 substrate  | Yes               | No          | Yes         | No          | Yes        |
| CYP1A2 inhibitor  | No                | No          | No          | No          | No         |
| CYP2C19 inhibitor | No                | No          | No          | No          | No         |
| CYP2C9 inhibitor  | No                | No          | No          | No          | No         |
| CYP2D6 inhibitor  | No                | No          | No          | No          | No         |
| CYP3A4 inhibitor  | No                | Yes         | No          | No          | No         |

**Table S6.** Predicted excretion routes of remdesivir, EGCG, TF2a, TF2b and TF3

| <b>Properties</b>                | <b>Remdesivir</b> | <b>EGCG</b> | <b>TF2a</b> | <b>TF2b</b> | <b>TF3</b> |
|----------------------------------|-------------------|-------------|-------------|-------------|------------|
| Total clearance<br>log ml/min/kg | 0.198             | 0.292       | -1.535      | -0.019      | -0.039     |
| Renal OCT2<br>substrate          | No                | No          | No          | Yes         | Yes        |

**Table S7:** SwissTargetPrediction report obtained using EGCG as the query molecule

| Target                                                                   | Common name                | Uniprot ID                 | ChEMBL ID     | Target Class               | Probability*   | Known actives (3D/2D) |
|--------------------------------------------------------------------------|----------------------------|----------------------------|---------------|----------------------------|----------------|-----------------------|
| Microtubule-associated protein tau                                       | MAPT                       | P10636                     | CHEMBL1293224 | Unclassified protein       | 1.0            | 2 / 1                 |
| DNA (cytosine-5)-methyltransferase 1                                     | DNMT1                      | P26358                     | CHEMBL1993    | Writer                     | 1.0            | 1 / 1                 |
| Dual-specificity tyrosine-phosphorylation regulated kinase 1A            | DYRK1A                     | Q13627                     | CHEMBL2292    | Kinase                     | 1.0            | 10 / 1                |
| Beta amyloid A4 protein                                                  | APP                        | P05067                     | CHEMBL2487    | Membrane receptor          | 1.0            | 3 / 2                 |
| MAP kinase p38 alpha                                                     | MAPK14                     | Q16539                     | CHEMBL260     | Kinase                     | 1.0            | 2 / 2                 |
| Telomerase reverse transcriptase                                         | TERT                       | O14746                     | CHEMBL2916    | Enzyme                     | 1.0            | 5 / 2                 |
| Matrix metalloproteinase 2                                               | MMP2                       | P08253                     | CHEMBL333     | Protease                   | 1.0            | 8 / 6                 |
| 6-phosphogluconate dehydrogenase                                         | PGD                        | P52209                     | CHEMBL3404    | Enzyme                     | 1.0            | 4 / 4                 |
| Hepatocyte growth factor receptor                                        | MET                        | P08581                     | CHEMBL3717    | Kinase                     | 1.0            | 6 / 6                 |
| Matrix metalloproteinase 14                                              | MMP14                      | P50281                     | CHEMBL3869    | Protease                   | 1.0            | 5 / 4                 |
| P-glycoprotein 1                                                         | ABCB1                      | P08183                     | CHEMBL4302    | Primary active transporter | 1.0            | 3 / 99                |
| Beta-secretase 1                                                         | BACE1                      | P56817                     | CHEMBL4822    | Protease                   | 1.0            | 14 / 14               |
| Apoptosis regulator Bcl-2                                                | BCL2                       | P10415                     | CHEMBL4860    | Other ion channel          | 1.0            | 5 / 7                 |
| Signal transducer and activator of transcription 1-alpha/beta            | STAT1                      | P42224                     | CHEMBL6101    | Transcription factor       | 1.0            | 1 / 1                 |
| Squalene monooxygenase (by homology)                                     | SQLE                       | Q14534                     | CHEMBL3592    | Enzyme                     | 1.0            | 1 / 9                 |
| HERG                                                                     | KCNH2                      | Q12809                     | CHEMBL240     | Voltage-gated ion channel  | 0.779416251511 | 1 / 1                 |
| CMP- N-acetylneuraminat-beta-1,4-galactoside alpha-2,3-sialyltransferase | ST3GAL3                    | Q11203                     | CHEMBL3596076 | Transferase                | 0.544613584146 | 1 / 1                 |
| Alpha-(1,3)-fucosyltransferase 7                                         | FUT7                       | Q11130                     | CHEMBL3596077 | Transferase                | 0.544613584146 | 1 / 1                 |
| Fucosyltransferase 4                                                     | FUT4                       | P22083                     | CHEMBL4996    | Enzyme                     | 0.544613584146 | 1 / 1                 |
| GABA- A receptor; alpha-1/ beta-2/ gamma-2                               | GABRA1<br>GABRB2<br>GABRG2 | P14867<br>P47870<br>P18507 | CHEMBL2095172 | Ligand-gated ion channel   | 0.109013467516 | 0 / 1                 |
| Carbonic anhydrase III                                                   | CA3                        | P07451                     | CHEMBL2885    | Lyase                      | 0.100634432184 | 0 / 2                 |
| Matrix                                                                   | MMP12                      | P39900                     | CHEMBL4393    | Protease                   | 0.100634432184 | 2 / 6                 |

| Target                                        | Common name | Uniprot ID | ChEMBL ID     | Target Class                            | Probability*   | Known actives (3D/2D) |
|-----------------------------------------------|-------------|------------|---------------|-----------------------------------------|----------------|-----------------------|
| metalloproteinase 12                          |             |            |               |                                         |                |                       |
| Carbonic anhydrase II                         | CA2         | P00918     | CHEMBL205     | Lyase                                   | 0.100634432184 | 6 / 2                 |
| Carbonic anhydrase I                          | CA1         | P00915     | CHEMBL261     | Lyase                                   | 0.100634432184 | 7 / 2                 |
| Carbonic anhydrase XII                        | CA12        | O43570     | CHEMBL3242    | Lyase                                   | 0.100634432184 | 5 / 8                 |
| Hypoxia-inducible factor 1 alpha              | HIF1A       | Q16665     | CHEMBL4261    | Transcription factor                    | 0.100634432184 | 0 / 6                 |
| Carbonic anhydrase VII                        | CA7         | P43166     | CHEMBL2326    | Lyase                                   | 0.100634432184 | 5 / 8                 |
| Carbonic anhydrase VI                         | CA6         | P23280     | CHEMBL3025    | Lyase                                   | 0.100634432184 | 2 / 2                 |
| Carbonic anhydrase IX                         | CA9         | Q16790     | CHEMBL3594    | Lyase                                   | 0.100634432184 | 6 / 1                 |
| Carbonic anhydrase VB                         | CA5B        | Q9Y2D0     | CHEMBL3969    | Lyase                                   | 0.100634432184 | 2 / 2                 |
| Carbonic anhydrase VA                         | CA5A        | P35218     | CHEMBL4789    | Lyase                                   | 0.100634432184 | 2 / 2                 |
| Cyclooxygenase-1                              | PTGS1       | P23219     | CHEMBL221     | Oxidoreductase                          | 0.100634432184 | 1 / 14                |
| Matrix metalloproteinase 9                    | MMP9        | P14780     | CHEMBL321     | Protease                                | 0.100634432184 | 7 / 6                 |
| ATP-binding cassette sub-family G member 2    | ABCG2       | Q9UNQ0     | CHEMBL5393    | Primary active transporter              | 0.100634432184 | 0 / 11                |
| Carbonic anhydrase IV                         | CA4         | P22748     | CHEMBL3729    | Lyase                                   | 0.100634432184 | 2 / 8                 |
| Kallikrein 1                                  | KLK1        | P06870     | CHEMBL2319    | Protease                                | 0.100634432184 | 0 / 1                 |
| Kallikrein 2                                  | KLK2        | P20151     | CHEMBL2442    | Protease                                | 0.100634432184 | 0 / 1                 |
| Matrix metalloproteinase 13                   | MMP13       | P45452     | CHEMBL280     | Protease                                | 0.100634432184 | 1 / 3                 |
| Multidrug resistance-associated protein 1     | ABCC1       | P33527     | CHEMBL3004    | Primary active transporter              | 0.100634432184 | 2 / 6                 |
| Carbonic anhydrase XIII                       | CA13        | Q8N1Q1     | CHEMBL3912    | Lyase                                   | 0.100634432184 | 2 / 1                 |
| Taste receptor type 2 member 31               | TAS2R31     | P59538     | CHEMBL2034804 | Taste family G protein-coupled receptor | 0.100634432184 | 0 / 3                 |
| Placenta growth factor                        | PGF         | P49763     | CHEMBL1697671 | Unclassified protein                    | 0.100634432184 | 0 / 3                 |
| Vascular endothelial growth factor A          | VEGFA       | P15692     | CHEMBL1783    | Secreted protein                        | 0.100634432184 | 0 / 3                 |
| Dynamin-1                                     | DNM1        | Q05193     | CHEMBL4958    | Enzyme                                  | 0.100634432184 | 4 / 0                 |
| Stem cell growth factor receptor              | KIT         | P10721     | CHEMBL1936    | Kinase                                  | 0.0            | 0 / 3                 |
| Vascular endothelial growth factor receptor 2 | KDR         | P35968     | CHEMBL279     | Kinase                                  | 0.0            | 0 / 6                 |
| Fibroblast growth factor receptor 1           | FGFR1       | P11362     | CHEMBL3650    | Kinase                                  | 0.0            | 0 / 3                 |
| Testis-specific androgen-binding protein      | SHBG        | P04278     | CHEMBL3305    | Secreted protein                        | 0.0            | 0 / 2                 |

| Target                                                  | Common name | Uniprot ID | ChEMBL ID     | Target Class                        | Probability* | Known actives (3D/2D) |
|---------------------------------------------------------|-------------|------------|---------------|-------------------------------------|--------------|-----------------------|
| Carbonyl reductase [NADPH] 1                            | CBR1        | P16152     | CHEMBL5586    | Enzyme                              | 0.0          | 0 / 1                 |
| Neuronal acetylcholine receptor protein alpha-7 subunit | CHRNA7      | P36544     | CHEMBL2492    | Ligand-gated ion channel            | 0.0          | 3 / 0                 |
| Dopamine D2 receptor (by homology)                      | DRD2        | P14416     | CHEMBL217     | Family A G protein-coupled receptor | 0.0          | 0 / 35                |
| Adenosine A3 receptor                                   | ADORA3      | P0DMS8     | CHEMBL256     | Family A G protein-coupled receptor | 0.0          | 0 / 3                 |
| Heat shock protein HSP 90-alpha                         | HSP90AA1    | P07900     | CHEMBL3880    | Other cytosolic protein             | 0.0          | 2 / 0                 |
| Retinoid X receptor alpha                               | RXRA        | P19793     | CHEMBL2061    | Nuclear receptor                    | 0.0          | 0 / 14                |
| Cytochrome P450 19A1                                    | CYP19A1     | P11511     | CHEMBL1978    | Cytochrome P450                     | 0.0          | 1 / 40                |
| Plasminogen activator inhibitor-1                       | SERPINE1    | P05121     | CHEMBL3475    | Secreted protein                    | 0.0          | 8 / 16                |
| Alpha-synuclein                                         | SNCA        | P37840     | CHEMBL6152    | Unclassified protein                | 0.0          | 20 / 0                |
| Estrogen receptor alpha                                 | ESR1        | P03372     | CHEMBL206     | Nuclear receptor                    | 0.0          | 8 / 84                |
| DNA polymerase beta (by homology)                       | POLB        | P06746     | CHEMBL2392    | Enzyme                              | 0.0          | 0 / 3                 |
| Estradiol 17-beta-dehydrogenase 2                       | HSD17B2     | P37059     | CHEMBL2789    | Enzyme                              | 0.0          | 34 / 0                |
| Phospholipase A2 group IIA                              | PLA2G2A     | P14555     | CHEMBL3474    | Enzyme                              | 0.0          | 0 / 5                 |
| Phospholipase A2 group V                                | PLA2G5      | P39877     | CHEMBL4323    | Enzyme                              | 0.0          | 0 / 1                 |
| Group X secretory phospholipase A2                      | PLA2G10     | O15496     | CHEMBL4342    | Enzyme                              | 0.0          | 0 / 1                 |
| 14-3-3 protein gamma                                    | YWHAG       | P61981     | CHEMBL1293296 | Unclassified protein                | 0.0          | 1 / 0                 |
| Serine/threonine-protein kinase RAF                     | RAF1        | P04049     | CHEMBL1906    | Kinase                              | 0.0          | 31 / 0                |
| Serine/threonine-protein kinase B-raf                   | BRAF        | P15056     | CHEMBL5145    | Kinase                              | 0.0          | 33 / 0                |
| Eukaryotic initiation factor 4A-I                       | EIF4A1      | P60842     | CHEMBL2052028 | Hydrolase                           | 0.0          | 0 / 29                |
| Thyroid hormone receptor alpha                          | THRA        | P10827     | CHEMBL1860    | Nuclear receptor                    | 0.0          | 4 / 0                 |
| Thyroid hormone receptor beta-1                         | THRB        | P10828     | CHEMBL1947    | Nuclear receptor                    | 0.0          | 4 / 0                 |
| Pyruvate dehydrogenase kinase isoform 1                 | PDK1        | Q15118     | CHEMBL4766    | Kinase                              | 0.0          | 37 / 0                |
| Alkaline phosphatase, tissue-nonspecific isozyme        | ALPL        | P05186     | CHEMBL5979    | Enzyme                              | 0.0          | 1 / 0                 |
| NADH-ubiquinone                                         | MT-ND4      | P03905     | CHEMBL4499    | Oxidoreductase                      | 0.0          | 0 / 4                 |

| Target                                           | Common name    | Uniprot ID       | ChEMBL ID     | Target Class                        | Probability* | Known actives (3D/2D) |
|--------------------------------------------------|----------------|------------------|---------------|-------------------------------------|--------------|-----------------------|
| oxidoreductase chain 4                           |                |                  |               |                                     |              |                       |
| Elastase 1                                       | CELA1          | Q9UNI1           | CHEMBL3000    | Protease                            | 0.0          | 1 / 0                 |
| Prolyl endopeptidase                             | PREP           | P48147           | CHEMBL3202    | Protease                            | 0.0          | 1 / 0                 |
| Tyrosyl-DNA phosphodiesterase 1                  | TDP1           | Q9NUW8           | CHEMBL1075138 | Enzyme                              | 0.0          | 0 / 2                 |
| Estradiol 17-beta-dehydrogenase 1                | HSD17B1        | P14061           | CHEMBL3181    | Enzyme                              | 0.0          | 34 / 1                |
| Poly [ADP-ribose] polymerase-1                   | PARP1          | P09874           | CHEMBL3105    | Enzyme                              | 0.0          | 1 / 0                 |
| Carbonic anhydrase XIV                           | CA14           | Q9ULX7           | CHEMBL3510    | Lyase                               | 0.0          | 4 / 0                 |
| Free fatty acid receptor 1                       | FFAR1          | O14842           | CHEMBL4422    | Family A G protein-coupled receptor | 0.0          | 0 / 92                |
| 5-lipoxygenase activating protein                | ALOX5AP        | P20292           | CHEMBL4550    | Other cytosolic protein             | 0.0          | 6 / 0                 |
| Peroxisome proliferator-activated receptor gamma | PPARG          | P37231           | CHEMBL235     | Nuclear receptor                    | 0.0          | 0 / 75                |
| Peroxisome proliferator-activated receptor alpha | PPARA          | Q07869           | CHEMBL239     | Nuclear receptor                    | 0.0          | 0 / 73                |
| Diacylglycerol O-acyltransferase 1               | DGAT1          | O75907           | CHEMBL6009    | Enzyme                              | 0.0          | 4 / 0                 |
| C-C chemokine receptor type 5                    | CCR5           | P51681           | CHEMBL274     | Family A G protein-coupled receptor | 0.0          | 6 / 0                 |
| Cytochrome P450 1B1                              | CYP1B1         | Q16678           | CHEMBL4878    | Cytochrome P450                     | 0.0          | 1 / 6                 |
| Cyclin-dependent kinase 5/CDK5 activator 1       | CDK5R1<br>CDK5 | Q15078<br>Q00535 | CHEMBL1907600 | Kinase                              | 0.0          | 7 / 0                 |
| Zinc finger protein GLI2                         | GLI2           | P10070           | CHEMBL5119    | Transcription factor                | 0.0          | 1 / 0                 |
| Zinc finger protein GLI1                         | GLI1           | P08151           | CHEMBL5461    | Transcription factor                | 0.0          | 1 / 0                 |
| Serine/threonine-protein kinase Chk1             | CHEK1          | O14757           | CHEMBL4630    | Kinase                              | 0.0          | 15 / 0                |
| Serine/threonine-protein kinase WEE1             | WEE1           | P30291           | CHEMBL5491    | Kinase                              | 0.0          | 7 / 0                 |
| Phospholipase A2 group 1B                        | PLA2G1B        | P04054           | CHEMBL4426    | Enzyme                              | 0.0          | 0 / 1                 |
| Voltage-gated potassium channel subunit Kv1.3    | KCNA3          | P22001           | CHEMBL4633    | Voltage-gated ion channel           | 0.0          | 0 / 1                 |
| Tyrosine-protein kinase ABL                      | ABL1           | P00519           | CHEMBL1862    | Kinase                              | 0.0          | 1 / 0                 |
| Platelet-derived growth factor receptor beta     | PDGFRB         | P09619           | CHEMBL1913    | Kinase                              | 0.0          | 1 / 0                 |
| Tyrosine-protein kinase receptor FLT3            | FLT3           | P36888           | CHEMBL1974    | Kinase                              | 0.0          | 2 / 0                 |

| Target                                         | Common name | Uniprot ID | ChEMBL ID     | Target Class | Probability* | Known actives (3D/2D) |
|------------------------------------------------|-------------|------------|---------------|--------------|--------------|-----------------------|
| Beta-galactoside alpha-2,6-sialyltransferase 1 | ST6GAL1     | P15907     | CHEMBL3596075 | Transferase  | 0.0          | 0 / 2                 |
| Serine/threonine-protein kinase Chk2           | CHEK2       | O96017     | CHEMBL2527    | Kinase       | 0.0          | 1 / 0                 |
| Sphingosine kinase 2                           | SPHK2       | Q9NRA0     | CHEMBL3023    | Enzyme       | 0.0          | 2 / 0                 |
| Sphingosine kinase 1                           | SPHK1       | Q9NYA1     | CHEMBL4394    | Enzyme       | 0.0          | 2 / 0                 |
| Insulin receptor                               | INSR        | P06213     | CHEMBL1981    | Kinase       | 0.0          | 3 / 0                 |

**Table S8:** SwissTargetPrediction report obtained using TF3 as the query molecule

| Target                                                                    | Common name                | Uniprot ID                 | ChEMBL ID     | Target Class               | Probability*    | Known actives (3D/2D) |
|---------------------------------------------------------------------------|----------------------------|----------------------------|---------------|----------------------------|-----------------|-----------------------|
| Apoptosis regulator Bcl-2                                                 | BCL2                       | P10415                     | CHEMBL4860    | Other ion channel          | 0.53418213932   | 4 / 7                 |
| Squalene monooxygenase (by homology)                                      | SQLE                       | Q14534                     | CHEMBL3592    | Enzyme                     | 0.179721075113  | 6 / 4                 |
| Microtubule-associated protein tau                                        | MAPT                       | P10636                     | CHEMBL1293224 | Unclassified protein       | 0.0927518343406 | 0 / 1                 |
| DNA (cytosine-5)-methyltransferase 1                                      | DNMT1                      | P26358                     | CHEMBL1993    | Writer                     | 0.0927518343406 | 0 / 1                 |
| Dual-specificity tyrosine-phosphorylation regulated kinase 1A             | DYRK1A                     | Q13627                     | CHEMBL2292    | Kinase                     | 0.0927518343406 | 0 / 1                 |
| HERG                                                                      | KCNH2                      | Q12809                     | CHEMBL240     | Voltage-gated ion channel  | 0.0927518343406 | 0 / 1                 |
| Beta amyloid A4 protein                                                   | APP                        | P05067                     | CHEMBL2487    | Membrane receptor          | 0.0927518343406 | 0 / 2                 |
| MAP kinase p38 alpha                                                      | MAPK14                     | Q16539                     | CHEMBL260     | Kinase                     | 0.0927518343406 | 0 / 2                 |
| Telomerase reverse transcriptase                                          | TERT                       | O14746                     | CHEMBL2916    | Enzyme                     | 0.0927518343406 | 0 / 1                 |
| Matrix metalloproteinase 2                                                | MMP2                       | P08253                     | CHEMBL333     | Protease                   | 0.0927518343406 | 0 / 4                 |
| 6-phosphogluconate dehydrogenase                                          | PGD                        | P52209                     | CHEMBL3404    | Enzyme                     | 0.0927518343406 | 0 / 4                 |
| CMP- N-acetylneuraminate-beta-1,4-galactoside alpha-2,3-sialyltransferase | ST3GAL3                    | Q11203                     | CHEMBL3596076 | Transferase                | 0.0927518343406 | 0 / 1                 |
| Alpha-(1,3)-fucosyltransferase 7                                          | FUT7                       | Q11130                     | CHEMBL3596077 | Transferase                | 0.0927518343406 | 0 / 1                 |
| Hepatocyte growth factor receptor                                         | MET                        | P08581                     | CHEMBL3717    | Kinase                     | 0.0927518343406 | 0 / 5                 |
| Matrix metalloproteinase 14                                               | MMP14                      | P50281                     | CHEMBL3869    | Protease                   | 0.0927518343406 | 0 / 4                 |
| Fucosyltransferase 4                                                      | FUT4                       | P22083                     | CHEMBL4996    | Enzyme                     | 0.0927518343406 | 0 / 1                 |
| Signal transducer and activator of transcription 1- alpha/ beta           | STAT1                      | P42224                     | CHEMBL6101    | Transcription factor       | 0.0927518343406 | 0 / 1                 |
| P-glycoprotein 1                                                          | ABCB1                      | P08183                     | CHEMBL4302    | Primary active transporter | 0.0833265263612 | 2 / 68                |
| Beta-secretase 1                                                          | BACE1                      | P56817                     | CHEMBL4822    | Protease                   | 0.0738845559978 | 8 / 12                |
| GABA- A receptor; alpha-1/ beta-2/ gamma-2                                | GABRA1<br>GABRB2<br>GABRG2 | P14867<br>P47870<br>P18507 | CHEMBL2095172 | Ligand-gated ion channel   | 0.0642387798076 | 0 / 1                 |
| Carbonic anhydrase                                                        | CA3                        | P07451                     | CHEMBL2885    | Lyase                      | 0.0642387798076 | 0 / 2                 |



| Target                                                      | Common name | Uniprot ID | ChEMBL ID     | Target Class                            | Probability*    | Known actives (3D/2D) |
|-------------------------------------------------------------|-------------|------------|---------------|-----------------------------------------|-----------------|-----------------------|
| III                                                         |             |            |               |                                         |                 |                       |
| Carbonic anhydrase VI                                       | CA6         | P23280     | CHEMBL3025    | Lyase                                   | 0.0642387798076 | 0 / 2                 |
| Carbonic anhydrase VB                                       | CA5B        | Q9Y2D0     | CHEMBL3969    | Lyase                                   | 0.0642387798076 | 0 / 2                 |
| Carbonic anhydrase VA                                       | CA5A        | P35218     | CHEMBL4789    | Lyase                                   | 0.0642387798076 | 0 / 2                 |
| Matrix metalloproteinase 13                                 | MMP13       | P45452     | CHEMBL280     | Protease                                | 0.0642387798076 | 0 / 1                 |
| Matrix metalloproteinase 12                                 | MMP12       | P39900     | CHEMBL4393    | Protease                                | 0.0642387798076 | 0 / 4                 |
| Cyclooxygenase-1                                            | PTGS1       | P23219     | CHEMBL221     | Oxidoreductase                          | 0.0642387798076 | 0 / 6                 |
| Hypoxia-inducible factor 1 alpha                            | HIF1A       | Q16665     | CHEMBL4261    | Transcription factor                    | 0.0642387798076 | 0 / 4                 |
| Carbonic anhydrase XIII                                     | CA13        | Q8N1Q1     | CHEMBL3912    | Lyase                                   | 0.0642387798076 | 0 / 1                 |
| Multidrug resistance-associated protein 1                   | ABCC1       | P33527     | CHEMBL3004    | Primary active transporter              | 0.0             | 0 / 6                 |
| ATP-binding cassette sub-family G member 2                  | ABCG2       | Q9UNQ0     | CHEMBL5393    | Primary active transporter              | 0.0             | 0 / 11                |
| Matrix metalloproteinase 9                                  | MMP9        | P14780     | CHEMBL321     | Protease                                | 0.0             | 0 / 3                 |
| Cytochrome P450 1B1                                         | CYP1B1      | Q16678     | CHEMBL4878    | Cytochrome P450                         | 0.0             | 0 / 6                 |
| Apoptosis regulator Bcl-X                                   | BCL2L1      | Q07817     | CHEMBL4625    | Other ion channel                       | 0.0             | 5 / 0                 |
| Carbonic anhydrase VII                                      | CA7         | P43166     | CHEMBL2326    | Lyase                                   | 0.0             | 1 / 8                 |
| Carbonic anhydrase XII                                      | CA12        | O43570     | CHEMBL3242    | Lyase                                   | 0.0             | 2 / 8                 |
| Carbonic anhydrase IV                                       | CA4         | P22748     | CHEMBL3729    | Lyase                                   | 0.0             | 1 / 8                 |
| Dopamine D2 receptor (by homology)                          | DRD2        | P14416     | CHEMBL217     | Family A G protein-coupled receptor     | 0.0             | 0 / 25                |
| Induced myeloid leukemia cell differentiation protein Mcl-1 | MCL1        | Q07820     | CHEMBL4361    | Other cytosolic protein                 | 0.0             | 3 / 0                 |
| Bcl-2-related protein A1                                    | BCL2A1      | Q16548     | CHEMBL6044    | Unclassified protein                    | 0.0             | 2 / 0                 |
| Taste receptor type 2 member 31                             | TAS2R31     | P59538     | CHEMBL2034804 | Taste family G protein-coupled receptor | 0.0             | 0 / 3                 |
| AMY1C                                                       | AMY1A       | P04745     | CHEMBL2478    | Enzyme                                  | 0.0             | 1 / 0                 |
| Placenta growth factor                                      | PGF         | P49763     | CHEMBL1697671 | Unclassified protein                    | 0.0             | 0 / 3                 |
| Vascular endothelial growth factor A                        | VEGFA       | P15692     | CHEMBL1783    | Secreted protein                        | 0.0             | 0 / 3                 |

| Target                                                 | Common name     | Uniprot ID       | ChEMBL ID     | Target Class                        | Probability* | Known actives (3D/2D) |
|--------------------------------------------------------|-----------------|------------------|---------------|-------------------------------------|--------------|-----------------------|
| Ribosomal protein S6 kinase alpha 3                    | RPS6KA3         | P51812           | CHEMBL2345    | Kinase                              | 0.0          | 9 / 0                 |
| Carbonic anhydrase II                                  | CA2             | P00918           | CHEMBL205     | Lyase                               | 0.0          | 1 / 2                 |
| Carbonic anhydrase I                                   | CA1             | P00915           | CHEMBL261     | Lyase                               | 0.0          | 1 / 2                 |
| Carbonic anhydrase IX                                  | CA9             | Q16790           | CHEMBL3594    | Lyase                               | 0.0          | 1 / 1                 |
| Thrombin                                               | F2              | P00734           | CHEMBL204     | Protease                            | 0.0          | 4 / 0                 |
| Calcitonin-gene-related peptide receptor, CALCRL/RAMP1 | CALCRL<br>RAMP1 | Q16602<br>O60894 | CHEMBL2107838 | Other membrane protein              | 0.0          | 1 / 0                 |
| Nitric oxide synthase, inducible (by homology)         | NOS2            | P35228           | CHEMBL4481    | Enzyme                              | 0.0          | 2 / 0                 |
| Stem cell growth factor receptor                       | KIT             | P10721           | CHEMBL1936    | Kinase                              | 0.0          | 0 / 3                 |
| Vascular endothelial growth factor receptor 2          | KDR             | P35968           | CHEMBL279     | Kinase                              | 0.0          | 0 / 4                 |
| Fibroblast growth factor receptor 1                    | FGFR1           | P11362           | CHEMBL3650    | Kinase                              | 0.0          | 0 / 3                 |
| Integrin alpha-3                                       | ITGA3           | P26006           | CHEMBL3525    | Membrane receptor                   | 0.0          | 3 / 0                 |
| Eukaryotic initiation factor 4A-I                      | EIF4A1          | P60842           | CHEMBL2052028 | Hydrolase                           | 0.0          | 0 / 25                |
| Retinoid X receptor alpha                              | RXRA            | P19793           | CHEMBL2061    | Nuclear receptor                    | 0.0          | 0 / 12                |
| Estradiol 17-beta-dehydrogenase 1                      | HSD17B1         | P14061           | CHEMBL3181    | Enzyme                              | 0.0          | 0 / 1                 |
| Testis-specific androgen-binding protein               | SHBG            | P04278           | CHEMBL3305    | Secreted protein                    | 0.0          | 0 / 1                 |
| Carbonyl reductase [NADPH] 1                           | CBR1            | P16152           | CHEMBL5586    | Enzyme                              | 0.0          | 0 / 1                 |
| Estrogen receptor beta                                 | ESR2            | Q92731           | CHEMBL242     | Nuclear receptor                    | 0.0          | 0 / 74                |
| Receptor-type tyrosine-protein phosphatase alpha       | PTPRA           | P18433           | CHEMBL3918    | Phosphatase                         | 0.0          | 1 / 0                 |
| Heat shock protein 75 kDa, mitochondrial               | TRAP1           | Q12931           | CHEMBL1075132 | Other cytosolic protein             | 0.0          | 2 / 0                 |
| Heat shock protein HSP 90-alpha                        | HSP90AA1        | P07900           | CHEMBL3880    | Other cytosolic protein             | 0.0          | 2 / 0                 |
| Heat shock protein HSP 90-beta                         | HSP90AB1        | P08238           | CHEMBL4303    | Other cytosolic protein             | 0.0          | 2 / 0                 |
| Monoamine oxidase B                                    | MAOB            | P27338           | CHEMBL2039    | Oxidoreductase                      | 0.0          | 0 / 56                |
| Adenosine A1 receptor (by homology)                    | ADORA1          | P30542           | CHEMBL226     | Family A G protein-coupled receptor | 0.0          | 0 / 4                 |

| Target                                                | Common name | Uniprot ID | ChEMBL ID     | Target Class                        | Probability* | Known actives (3D/2D) |
|-------------------------------------------------------|-------------|------------|---------------|-------------------------------------|--------------|-----------------------|
| Adenosine A3 receptor                                 | ADORA3      | P0DMS8     | CHEMBL256     | Family A G protein-coupled receptor | 0.0          | 0 / 2                 |
| Metastin receptor                                     | KISS1R      | Q969F8     | CHEMBL5413    | Family A G protein-coupled receptor | 0.0          | 2 / 0                 |
| cAMP-dependent protein kinase alpha-catalytic subunit | PRKACA      | P17612     | CHEMBL4101    | Kinase                              | 0.0          | 2 / 0                 |
| Acetylcholinesterase                                  | ACHE        | P22303     | CHEMBL220     | Hydrolase                           | 0.0          | 0 / 3                 |
| Tyrosine-protein kinase SYK                           | SYK         | P43405     | CHEMBL2599    | Kinase                              | 0.0          | 1 / 0                 |
| DNA polymerase beta (by homology)                     | POLB        | P06746     | CHEMBL2392    | Enzyme                              | 0.0          | 0 / 2                 |
| Free fatty acid receptor 1                            | FFAR1       | O14842     | CHEMBL4422    | Family A G protein-coupled receptor | 0.0          | 0 / 63                |
| Beta-galactoside alpha-2,6-sialyltransferase 1        | ST6GAL1     | P15907     | CHEMBL3596075 | Transferase                         | 0.0          | 0 / 2                 |
| Phospholipase A2 group IIA                            | PLA2G2A     | P14555     | CHEMBL3474    | Enzyme                              | 0.0          | 0 / 5                 |
| Phospholipase A2 group V                              | PLA2G5      | P39877     | CHEMBL4323    | Enzyme                              | 0.0          | 0 / 1                 |
| Group X secretory phospholipase A2                    | PLA2G10     | O15496     | CHEMBL4342    | Enzyme                              | 0.0          | 0 / 1                 |
| NADH-ubiquinone oxidoreductase chain 4                | MT-ND4      | P03905     | CHEMBL4499    | Oxidoreductase                      | 0.0          | 0 / 4                 |
| Lysine-specific histone demethylase 1                 | KDM1A       | O60341     | CHEMBL6136    | Eraser                              | 0.0          | 1 / 0                 |
| Bile salt export pump                                 | ABCB11      | O95342     | CHEMBL6020    | Primary active transporter          | 0.0          | 1 / 0                 |
| Tyrosyl-DNA phosphodiesterase 1                       | TDP1        | Q9NUW8     | CHEMBL1075138 | Enzyme                              | 0.0          | 0 / 2                 |
| Phospholipase A2 group 1B                             | PLA2G1B     | P04054     | CHEMBL4426    | Enzyme                              | 0.0          | 0 / 1                 |
| FK506-binding protein 1A                              | FKBP1A      | P62942     | CHEMBL1902    | Isomerase                           | 0.0          | 1 / 0                 |
| Peptidyl-prolyl cis-trans isomerase FKBP5             | FKBP5       | Q13451     | CHEMBL2052031 | Enzyme                              | 0.0          | 1 / 0                 |
| Carbonic anhydrase XIV                                | CA14        | Q9ULX7     | CHEMBL3510    | Lyase                               | 0.0          | 1 / 0                 |
| Lysine-specific demethylase 2A                        | KDM2A       | Q9Y2K7     | CHEMBL1938210 | Eraser                              | 0.0          | 1 / 0                 |
| Lysine-specific demethylase 6B                        | KDM6B       | O15054     | CHEMBL1938211 | Eraser                              | 0.0          | 1 / 0                 |
| Phosphodiesterase 5A                                  | PDE5A       | O76074     | CHEMBL1827    | Phosphodiesterase                   | 0.0          | 1 / 0                 |
| Pyruvate dehydrogenase kinase isoform 1               | PDK1        | Q15118     | CHEMBL4766    | Kinase                              | 0.0          | 1 / 0                 |
| Pregnane X receptor                                   | NR1I2       | O75469     | CHEMBL3401    | Nuclear receptor                    | 0.0          | 1 / 0                 |

| Target                                           | Common name | Uniprot ID | ChEMBL ID  | Target Class                        | Probability* | Known actives (3D/2D) |
|--------------------------------------------------|-------------|------------|------------|-------------------------------------|--------------|-----------------------|
| Caspase-1                                        | CASP1       | P29466     | CHEMBL4801 | Protease                            | 0.0          | 1 / 0                 |
| Cannabinoid receptor 1 (by homology)             | CNR1        | P21554     | CHEMBL218  | Family A G protein-coupled receptor | 0.0          | 0 / 45                |
| Cannabinoid receptor 2                           | CNR2        | P34972     | CHEMBL253  | Family A G protein-coupled receptor | 0.0          | 0 / 47                |
| Cytochrome P450 19A1                             | CYP19A1     | P11511     | CHEMBL1978 | Cytochrome P450                     | 0.0          | 2 / 36                |
| Coagulation factor VII                           | F7          | P08709     | CHEMBL3991 | Protease                            | 0.0          | 2 / 0                 |
| Sulfonylurea receptor 2                          | ABCC9       | O60706     | CHEMBL1971 | Primary active transporter          | 0.0          | 0 / 1                 |
| Leukotriene B4 receptor 1                        | LTB4R       | Q15722     | CHEMBL3911 | Family A G protein-coupled receptor | 0.0          | 0 / 11                |
| Peroxisome proliferator-activated receptor gamma | PPARG       | P37231     | CHEMBL235  | Nuclear receptor                    | 0.0          | 0 / 34                |
| Peroxisome proliferator-activated receptor alpha | PPARA       | Q07869     | CHEMBL239  | Nuclear receptor                    | 0.0          | 0 / 36                |

**Table S9:** SwissTargetPrediction report obtained using TF2a as the query molecule

| Target                                                                    | Common name | Uniprot ID | ChEMBL ID     | Target Class               | Probability*    | Known actives (3D/2D) |
|---------------------------------------------------------------------------|-------------|------------|---------------|----------------------------|-----------------|-----------------------|
| Beta amyloid A4 protein                                                   | APP         | P05067     | CHEMBL2487    | Membrane receptor          | 0.0498457217793 | 3 / 2                 |
| Microtubule-associated protein tau                                        | MAPT        | P10636     | CHEMBL1293224 | Unclassified protein       | 0.0498457217793 | 0 / 1                 |
| Dual-specificity tyrosine-phosphorylation regulated kinase 1A             | DYRK1A      | Q13627     | CHEMBL2292    | Kinase                     | 0.0498457217793 | 0 / 1                 |
| Telomerase reverse transcriptase                                          | TERT        | O14746     | CHEMBL2916    | Enzyme                     | 0.0498457217793 | 0 / 2                 |
| 6-phosphogluconate dehydrogenase                                          | PGD         | P52209     | CHEMBL3404    | Enzyme                     | 0.0498457217793 | 0 / 4                 |
| CMP- N-acetylneuraminate-beta-1,4-galactoside alpha-2,3-sialyltransferase | ST3GAL3     | Q11203     | CHEMBL3596076 | Transferase                | 0.0498457217793 | 0 / 1                 |
| Alpha-(1,3)-fucosyltransferase 7                                          | FUT7        | Q11130     | CHEMBL3596077 | Transferase                | 0.0498457217793 | 0 / 1                 |
| Fucosyltransferase 4                                                      | FUT4        | P22083     | CHEMBL4996    | Enzyme                     | 0.0498457217793 | 0 / 1                 |
| Signal transducer and activator of transcription 1-alpha/beta             | STAT1       | P42224     | CHEMBL6101    | Transcription factor       | 0.0498457217793 | 0 / 1                 |
| Matrix metalloproteinase 2                                                | MMP2        | P08253     | CHEMBL333     | Protease                   | 0.0498457217793 | 27 / 12               |
| Apoptosis regulator Bcl-2                                                 | BCL2        | P10415     | CHEMBL4860    | Other ion channel          | 0.0498457217793 | 34 / 7                |
| HERG                                                                      | KCNH2       | Q12809     | CHEMBL240     | Voltage-gated ion channel  | 0.0498457217793 | 58 / 2                |
| Beta-secretase 1                                                          | BACE1       | P56817     | CHEMBL4822    | Protease                   | 0.0498457217793 | 86 / 12               |
| Squalene monooxygenase (by homology)                                      | SQLE        | Q14534     | CHEMBL3592    | Enzyme                     | 0.0498457217793 | 1 / 5                 |
| P-glycoprotein 1                                                          | ABCB1       | P08183     | CHEMBL4302    | Primary active transporter | 0.0498457217793 | 6 / 58                |
| Hepatocyte growth factor receptor                                         | MET         | P08581     | CHEMBL3717    | Kinase                     | 0.0498457217793 | 7 / 5                 |
| Matrix metalloproteinase 14                                               | MMP14       | P50281     | CHEMBL3869    | Protease                   | 0.0498457217793 | 7 / 4                 |
| DNA (cytosine-5)-methyltransferase 1                                      | DNMT1       | P26358     | CHEMBL1993    | Writer                     | 0.0             | 1 / 1                 |
| Thrombin                                                                  | F2          | P00734     | CHEMBL204     | Protease                   | 0.0             | 161 / 0               |
| MAP kinase p38 alpha                                                      | MAPK14      | Q16539     | CHEMBL260     | Kinase                     | 0.0             | 3 / 2                 |
| Plasminogen (by homology)                                                 | PLG         | P00747     | CHEMBL1801    | Protease                   | 0.0             | 55 / 0                |
| Trypsin I (by homology)                                                   | PRSS1       | P07477     | CHEMBL209     | Protease                   | 0.0             | 75 / 0                |

| Target                                      | Common name                | Uniprot ID                 | ChEMBL ID     | Target Class                        | Probability* | Known actives (3D/2D) |
|---------------------------------------------|----------------------------|----------------------------|---------------|-------------------------------------|--------------|-----------------------|
| Trypsin III (by homology)                   | PRSS3                      | P35030                     | CHEMBL4551    | Protease                            | 0.0          | 16 / 0                |
| Tissue-type plasminogen activator           | PLAT                       | P00750                     | CHEMBL1873    | Protease                            | 0.0          | 15 / 0                |
| Thymidylate synthase (by homology)          | TYMS                       | P04818                     | CHEMBL1952    | Transferase                         | 0.0          | 2 / 0                 |
| GABA-A receptor; alpha-1/beta-2/gamma-2     | GABRA1<br>GABRB2<br>GABRG2 | P14867<br>P47870<br>P18507 | CHEMBL2095172 | Ligand-gated ion channel            | 0.0          | 0 / 1                 |
| Proteinase-activated receptor 1             | F2R                        | P25116                     | CHEMBL3974    | Family A G protein-coupled receptor | 0.0          | 9 / 0                 |
| Cyclin-dependent kinase 2/cyclin E          | CCNE2<br>CDK2<br>CCNE1     | O96020<br>P24941<br>P24864 | CHEMBL2094126 | Other cytosolic protein             | 0.0          | 2 / 0                 |
| Protein-tyrosine phosphatase 1B             | PTPN1                      | P18031                     | CHEMBL335     | Phosphatase                         | 0.0          | 8 / 21                |
| Insulin-degrading enzyme                    | IDE                        | P14735                     | CHEMBL1293287 | Enzyme                              | 0.0          | 3 / 0                 |
| Beta-3 adrenergic receptor                  | ADRB3                      | P13945                     | CHEMBL246     | Family A G protein-coupled receptor | 0.0          | 71 / 0                |
| Renin                                       | REN                        | P00797                     | CHEMBL286     | Protease                            | 0.0          | 92 / 0                |
| Tryptase beta-1                             | TPSAB1                     | Q15661                     | CHEMBL2617    | Protease                            | 0.0          | 3 / 0                 |
| Urokinase-type plasminogen activator        | PLAU                       | P00749                     | CHEMBL3286    | Protease                            | 0.0          | 45 / 0                |
| Transmembrane protease serine 11D           | TMPRSS11D                  | O60235                     | CHEMBL1795138 | Protease                            | 0.0          | 1 / 0                 |
| Angiotensin-converting enzyme               | ACE                        | P12821                     | CHEMBL1808    | Protease                            | 0.0          | 5 / 0                 |
| Anandamide amidohydrolase                   | FAAH                       | O00519                     | CHEMBL2243    | Enzyme                              | 0.0          | 5 / 0                 |
| Adenosine A2a receptor (by homology)        | ADORA2A                    | P29274                     | CHEMBL251     | Family A G protein-coupled receptor | 0.0          | 17 / 0                |
| Monoglyceride lipase                        | MGLL                       | Q99685                     | CHEMBL4191    | Enzyme                              | 0.0          | 4 / 0                 |
| Monoacylglycerol lipase ABHD6 (by homology) | ABHD6                      | Q9BV23                     | CHEMBL2189127 | Enzyme                              | 0.0          | 4 / 0                 |
| Beta-1 adrenergic receptor                  | ADRB1                      | P08588                     | CHEMBL213     | Family A G protein-coupled receptor | 0.0          | 82 / 0                |
| Serotonin 1a (5-HT1a) receptor              | HTR1A                      | P08908                     | CHEMBL214     | Family A G protein-coupled receptor | 0.0          | 21 / 0                |
| Interleukin-1 receptor-associated kinase 4  | IRAK4                      | Q9NWZ3                     | CHEMBL3778    | Kinase                              | 0.0          | 30 / 0                |
| Furin                                       | FURIN                      | P09958                     | CHEMBL2611    | Protease                            | 0.0          | 2 / 0                 |
| Kallikrein 2                                | KLK2                       | P20151                     | CHEMBL2442    | Protease                            | 0.0          | 0 / 1                 |

| Target                                                      | Common name | Uniprot ID | ChEMBL ID     | Target Class                        | Probability* | Known actives (3D/2D) |
|-------------------------------------------------------------|-------------|------------|---------------|-------------------------------------|--------------|-----------------------|
| Macrophage colony stimulating factor receptor (by homology) | CSF1R       | P07333     | CHEMBL1844    | Kinase                              | 0.0          | 13 / 0                |
| Serine/threonine-protein kinase mTOR                        | MTOR        | P42345     | CHEMBL2842    | Kinase                              | 0.0          | 92 / 0                |
| PI3-kinase p110-alpha subunit                               | PIK3CA      | P42336     | CHEMBL4005    | Enzyme                              | 0.0          | 65 / 0                |
| Somatostatin receptor 4                                     | SSTR4       | P31391     | CHEMBL1853    | Family A G protein-coupled receptor | 0.0          | 3 / 0                 |
| Adrenergic receptor beta                                    | ADRB2       | P07550     | CHEMBL210     | Family A G protein-coupled receptor | 0.0          | 81 / 0                |
| Muscarinic acetylcholine receptor M2                        | CHRM2       | P08172     | CHEMBL211     | Family A G protein-coupled receptor | 0.0          | 12 / 0                |
| Muscarinic acetylcholine receptor M3                        | CHRM3       | P20309     | CHEMBL245     | Family A G protein-coupled receptor | 0.0          | 11 / 0                |
| Cathepsin D                                                 | CTSD        | P07339     | CHEMBL2581    | Protease                            | 0.0          | 9 / 0                 |
| Cytochrome P450 19A1                                        | CYP19A1     | P11511     | CHEMBL1978    | Cytochrome P450                     | 0.0          | 0 / 35                |
| Xaa-Pro aminopeptidase 1                                    | XPNPEP1     | Q9NQW7     | CHEMBL3782    | Protease                            | 0.0          | 1 / 0                 |
| Leucine aminopeptidase                                      | LAP3        | P28838     | CHEMBL3965    | Protease                            | 0.0          | 2 / 0                 |
| Ribosomal protein S6 kinase 1                               | RPS6KB1     | P23443     | CHEMBL4501    | Kinase                              | 0.0          | 7 / 0                 |
| Xaa-Pro aminopeptidase 2                                    | XPNPEP2     | O43895     | CHEMBL4610    | Protease                            | 0.0          | 1 / 0                 |
| Serine/threonine-protein kinase Chk1                        | CHEK1       | O14757     | CHEMBL4630    | Kinase                              | 0.0          | 21 / 0                |
| Serine protease hepsin                                      | HPN         | P05981     | CHEMBL2079849 | Protease                            | 0.0          | 7 / 0                 |
| Matriptase                                                  | ST14        | Q9Y5Y6     | CHEMBL3018    | Protease                            | 0.0          | 10 / 0                |
| Hepatocyte growth factor activator                          | HGFAC       | Q04756     | CHEMBL3351190 | Unclassified protein                | 0.0          | 8 / 0                 |
| Proteasome Macropain subunit                                | PSMB2       | P49721     | CHEMBL3492    | Protease                            | 0.0          | 3 / 0                 |
| Mitogen-activated protein kinase kinase kinase 14           | MAP3K14     | Q99558     | CHEMBL5888    | Kinase                              | 0.0          | 86 / 0                |
| Bradykinin B1 receptor                                      | BDKRB1      | P46663     | CHEMBL4308    | Family A G protein-coupled receptor | 0.0          | 20 / 0                |
| Coagulation factor IX                                       | F9          | P00740     | CHEMBL2016    | Protease                            | 0.0          | 9 / 0                 |
| Estradiol 17-beta-dehydrogenase 2                           | HSD17B2     | P37059     | CHEMBL2789    | Enzyme                              | 0.0          | 15 / 0                |
| Endothelin-converting enzyme 1                              | ECE1        | P42892     | CHEMBL4791    | Protease                            | 0.0          | 2 / 0                 |
| Coagulation factor XI                                       | F11         | P03951     | CHEMBL2820    | Protease                            | 0.0          | 8 / 0                 |

| Target                                                     | Common name | Uniprot ID | ChEMBL ID     | Target Class                        | Probability* | Known actives (3D/2D) |
|------------------------------------------------------------|-------------|------------|---------------|-------------------------------------|--------------|-----------------------|
| Dipeptidyl peptidase IV                                    | DPP4        | P27487     | CHEMBL284     | Protease                            | 0.0          | 6 / 0                 |
| Dipeptidyl peptidase II                                    | DPP7        | Q9UHL4     | CHEMBL3976    | Protease                            | 0.0          | 5 / 0                 |
| Dipeptidyl peptidase VIII                                  | DPP8        | Q6V1X1     | CHEMBL4657    | Protease                            | 0.0          | 5 / 0                 |
| PDZ-binding kinase                                         | PBK         | Q96KB5     | CHEMBL4896    | Kinase                              | 0.0          | 4 / 0                 |
| Receptor-type tyrosine-protein phosphatase F (LAR)         | PTPRF       | P10586     | CHEMBL3521    | Membrane receptor                   | 0.0          | 0 / 2                 |
| Indoleamine 2,3-dioxygenase                                | IDO1        | P14902     | CHEMBL4685    | Enzyme                              | 0.0          | 0 / 3                 |
| Dihydrofolate reductase (by homology)                      | DHFR        | P00374     | CHEMBL202     | Oxidoreductase                      | 0.0          | 9 / 0                 |
| Coagulation factor VII                                     | F7          | P08709     | CHEMBL3991    | Protease                            | 0.0          | 11 / 0                |
| Retinoid X receptor alpha                                  | RXRA        | P19793     | CHEMBL2061    | Nuclear receptor                    | 0.0          | 0 / 10                |
| Caspase-3                                                  | CASP3       | P42574     | CHEMBL2334    | Protease                            | 0.0          | 1 / 0                 |
| Dual specificity mitogen-activated protein kinase kinase 1 | MAP2K1      | Q02750     | CHEMBL3587    | Kinase                              | 0.0          | 2 / 0                 |
| Serotonin 1b (5-HT1b) receptor                             | HTR1B       | P28222     | CHEMBL1898    | Family A G protein-coupled receptor | 0.0          | 12 / 0                |
| Neprilysin                                                 | MME         | P08473     | CHEMBL1944    | Protease                            | 0.0          | 1 / 0                 |
| Serotonin 1d (5-HT1d) receptor                             | HTR1D       | P28221     | CHEMBL1983    | Family A G protein-coupled receptor | 0.0          | 23 / 0                |
| Alpha-1a adrenergic receptor                               | ADRA1A      | P35348     | CHEMBL229     | Family A G protein-coupled receptor | 0.0          | 15 / 0                |
| Vanilloid receptor (by homology)                           | TRPV1       | Q8NER1     | CHEMBL4794    | Voltage-gated ion channel           | 0.0          | 16 / 0                |
| Tyrosine-protein kinase JAK2                               | JAK2        | O60674     | CHEMBL2971    | Kinase                              | 0.0          | 14 / 0                |
| Cyclin-dependent kinase 2                                  | CDK2        | P24941     | CHEMBL301     | Kinase                              | 0.0          | 11 / 0                |
| Phosphatidylinositol 3-kinase catalytic subunit type 3     | PIK3C3      | Q8NEB9     | CHEMBL1075165 | Enzyme                              | 0.0          | 4 / 0                 |
| PI3-kinase p110-delta subunit                              | PIK3CD      | O00329     | CHEMBL3130    | Enzyme                              | 0.0          | 18 / 0                |
| DNA-dependent protein kinase                               | PRKDC       | P78527     | CHEMBL3142    | Kinase                              | 0.0          | 17 / 0                |
| PI3-kinase p110-beta subunit                               | PIK3CB      | P42338     | CHEMBL3145    | Enzyme                              | 0.0          | 29 / 0                |
| PI3-kinase p110-gamma subunit                              | PIK3CG      | P48736     | CHEMBL3267    | Enzyme                              | 0.0          | 20 / 0                |
| Thrombin and coagulation factor X                          | F10         | P00742     | CHEMBL244     | Protease                            | 0.0          | 108 / 3               |



| Target                           | Common name | Uniprot ID | ChEMBL ID     | Target Class                        | Probability* | Known actives (3D/2D) |
|----------------------------------|-------------|------------|---------------|-------------------------------------|--------------|-----------------------|
| Bromodomain-containing protein 4 | BRD4        | O60885     | CHEMBL1163125 | Reader                              | 0.0          | 15 / 0                |
| P2X purinoceptor 3               | P2RX3       | P56373     | CHEMBL2998    | Ligand-gated ion channel            | 0.0          | 23 / 0                |
| Serotonin 7 (5-HT7) receptor     | HTR7        | P34969     | CHEMBL3155    | Family A G protein-coupled receptor | 0.0          | 2 / 0                 |
| Bone morphogenetic protein 1     | BMP1        | P13497     | CHEMBL3898    | Protease                            | 0.0          | 9 / 0                 |
| Neuropeptide Y receptor type 1   | NPY1R       | P25929     | CHEMBL4777    | Family A G protein-coupled receptor | 0.0          | 11 / 0                |
| WD repeat-containing protein 5   | WDR5        | P61964     | CHEMBL1075317 | Unclassified protein                | 0.0          | 1 / 0                 |
| Cyclin-dependent kinase 1        | CDK1        | P06493     | CHEMBL308     | Kinase                              | 0.0          | 8 / 0                 |

**Table S10:** SwissTargetPrediction report obtained using TF2b as the query molecule

| Target                                                                   | Common name      | Uniprot ID       | ChEMBL ID     | Target Class               | Probability*    | Known actives (3D/2D) |
|--------------------------------------------------------------------------|------------------|------------------|---------------|----------------------------|-----------------|-----------------------|
| Apoptosis regulator Bcl-2                                                | BCL2             | P10415           | CHEMBL4860    | Other ion channel          | 0.950473054407  | 5 / 7                 |
| Microtubule-associated protein tau                                       | MAPT             | P10636           | CHEMBL1293224 | Unclassified protein       | 0.0841390721621 | 0 / 1                 |
| DNA (cytosine-5)-methyltransferase 1                                     | DNMT1            | P26358           | CHEMBL1993    | Writer                     | 0.0841390721621 | 0 / 1                 |
| Dual-specificity tyrosine-phosphorylation regulated kinase 1A            | DYRK1A           | Q13627           | CHEMBL2292    | Kinase                     | 0.0841390721621 | 0 / 1                 |
| HERG                                                                     | KCNH2            | Q12809           | CHEMBL240     | Voltage-gated ion channel  | 0.0841390721621 | 0 / 1                 |
| Beta amyloid A4 protein                                                  | APP              | P05067           | CHEMBL2487    | Membrane receptor          | 0.0841390721621 | 0 / 2                 |
| MAP kinase p38 alpha                                                     | MAPK14           | Q16539           | CHEMBL260     | Kinase                     | 0.0841390721621 | 0 / 2                 |
| Telomerase reverse transcriptase                                         | TERT             | O14746           | CHEMBL2916    | Enzyme                     | 0.0841390721621 | 0 / 1                 |
| Matrix metalloproteinase 2                                               | MMP2             | P08253           | CHEMBL333     | Protease                   | 0.0841390721621 | 0 / 4                 |
| 6-phosphogluconate dehydrogenase                                         | PGD              | P52209           | CHEMBL3404    | Enzyme                     | 0.0841390721621 | 0 / 4                 |
| CMP-N-acetylneuraminate-beta-1,4-galactoside alpha-2,3-sialyltransferase | ST3GAL3          | Q11203           | CHEMBL3596076 | Transferase                | 0.0841390721621 | 0 / 1                 |
| Alpha-(1,3)-fucosyltransferase 7                                         | FUT7             | Q11130           | CHEMBL3596077 | Transferase                | 0.0841390721621 | 0 / 1                 |
| Hepatocyte growth factor receptor                                        | MET              | P08581           | CHEMBL3717    | Kinase                     | 0.0841390721621 | 0 / 5                 |
| Matrix metalloproteinase 14                                              | MMP14            | P50281           | CHEMBL3869    | Protease                   | 0.0841390721621 | 0 / 4                 |
| Fucosyltransferase 4                                                     | FUT4             | P22083           | CHEMBL4996    | Enzyme                     | 0.0841390721621 | 0 / 1                 |
| Signal transducer and activator of transcription 1-alpha/beta            | STAT1            | P42224           | CHEMBL6101    | Transcription factor       | 0.0841390721621 | 0 / 1                 |
| P-glycoprotein 1                                                         | ABCB1            | P08183           | CHEMBL4302    | Primary active transporter | 0.0841390721621 | 3 / 68                |
| Squalene monooxygenase (by homology)                                     | SQLE             | Q14534           | CHEMBL3592    | Enzyme                     | 0.0841390721621 | 7 / 4                 |
| Beta-secretase 1                                                         | BACE1            | P56817           | CHEMBL4822    | Protease                   | 0.0742995456363 | 8 / 12                |
| GABA- A receptor; alpha-1/ beta-2/                                       | GABRA1<br>GABRB2 | P14867<br>P47870 | CHEMBL2095172 | Ligand-gated ion channel   | 0.0345221577323 | 0 / 1                 |

| Target                                                | Common name | Uniprot ID | ChEMBL ID     | Target Class               | Probability*    | Known actives (3D/2D) |
|-------------------------------------------------------|-------------|------------|---------------|----------------------------|-----------------|-----------------------|
| gamma-2                                               | GABRG2      | P18507     |               |                            |                 |                       |
| Carbonic anhydrase III                                | CA3         | P07451     | CHEMBL2885    | Lyase                      | 0.0345221577323 | 0 / 2                 |
| Carbonic anhydrase VI                                 | CA6         | P23280     | CHEMBL3025    | Lyase                      | 0.0345221577323 | 0 / 2                 |
| Carbonic anhydrase VB                                 | CA5B        | Q9Y2D0     | CHEMBL3969    | Lyase                      | 0.0345221577323 | 0 / 2                 |
| Carbonic anhydrase VA                                 | CA5A        | P35218     | CHEMBL4789    | Lyase                      | 0.0345221577323 | 0 / 2                 |
| Matrix metalloproteinase 13                           | MMP13       | P45452     | CHEMBL280     | Protease                   | 0.0345221577323 | 0 / 1                 |
| Matrix metalloproteinase 12                           | MMP12       | P39900     | CHEMBL4393    | Protease                   | 0.0345221577323 | 0 / 4                 |
| Cyclooxygenase-1                                      | PTGS1       | P23219     | CHEMBL221     | Oxidoreductase             | 0.0345221577323 | 0 / 6                 |
| Carbonic anhydrase VII                                | CA7         | P43166     | CHEMBL2326    | Lyase                      | 0.0345221577323 | 4 / 8                 |
| Carbonic anhydrase XII                                | CA12        | O43570     | CHEMBL3242    | Lyase                      | 0.0345221577323 | 11 / 8                |
| Carbonic anhydrase IV                                 | CA4         | P22748     | CHEMBL3729    | Lyase                      | 0.0345221577323 | 2 / 8                 |
| Hypoxia-inducible factor 1 alpha                      | HIF1A       | Q16665     | CHEMBL4261    | Transcription factor       | 0.0345221577323 | 0 / 4                 |
| Apoptosis regulator Bcl-X                             | BCL2L1      | Q07817     | CHEMBL4625    | Other ion channel          | 0.0345221577323 | 6 / 0                 |
| Carbonic anhydrase XIII                               | CA13        | Q8N1Q1     | CHEMBL3912    | Lyase                      | 0.0345221577323 | 0 / 1                 |
| ATP-binding cassette sub-family G member 2            | ABCG2       | Q9UNQ0     | CHEMBL5393    | Primary active transporter | 0.0             | 0 / 11                |
| Carbonic anhydrase II                                 | CA2         | P00918     | CHEMBL205     | Lyase                      | 0.0             | 10 / 2                |
| Carbonic anhydrase I                                  | CA1         | P00915     | CHEMBL261     | Lyase                      | 0.0             | 9 / 2                 |
| Carbonic anhydrase IX                                 | CA9         | Q16790     | CHEMBL3594    | Lyase                      | 0.0             | 10 / 1                |
| Matrix metalloproteinase 9                            | MMP9        | P14780     | CHEMBL321     | Protease                   | 0.0             | 0 / 3                 |
| cAMP-dependent protein kinase alpha-catalytic subunit | PRKACA      | P17612     | CHEMBL4101    | Kinase                     | 0.0             | 15 / 0                |
| Cytochrome P450 1B1                                   | CYP1B1      | Q16678     | CHEMBL4878    | Cytochrome P450            | 0.0             | 0 / 6                 |
| Ribosomal protein S6 kinase alpha 3                   | RPS6KA3     | P51812     | CHEMBL2345    | Kinase                     | 0.0             | 13 / 0                |
| Coagulation factor VII                                | F7          | P08709     | CHEMBL3991    | Protease                   | 0.0             | 2 / 0                 |
| Transitional endoplasmic reticulum ATPase             | VCP         | P55072     | CHEMBL1075145 | Primary active transporter | 0.0             | 2 / 0                 |

| Target                                                      | Common name             | Uniprot ID                 | ChEMBL ID     | Target Class                            | Probability* | Known actives (3D/2D) |
|-------------------------------------------------------------|-------------------------|----------------------------|---------------|-----------------------------------------|--------------|-----------------------|
| Troponin, cardiac muscle                                    | TNNC1<br>TNNT2<br>TNNI3 | P63316<br>P45379<br>P19429 | CHEMBL2095202 | Unclassified protein                    | 0.0          | 1 / 0                 |
| Dopamine D2 receptor (by homology)                          | DRD2                    | P14416                     | CHEMBL217     | Family A G protein-coupled receptor     | 0.0          | 0 / 25                |
| Taste receptor type 2 member 31                             | TAS2R31                 | P59538                     | CHEMBL2034804 | Taste family G protein-coupled receptor | 0.0          | 0 / 3                 |
| Tyrosine-protein kinase LCK                                 | LCK                     | P06239                     | CHEMBL258     | Kinase                                  | 0.0          | 1 / 0                 |
| DNA-3-methyladenine glycosylase                             | MPG                     | P29372                     | CHEMBL3396943 | Enzyme                                  | 0.0          | 1 / 0                 |
| Induced myeloid leukemia cell differentiation protein Mcl-1 | MCL1                    | Q07820                     | CHEMBL4361    | Other cytosolic protein                 | 0.0          | 4 / 0                 |
| Placenta growth factor                                      | PGF                     | P49763                     | CHEMBL1697671 | Unclassified protein                    | 0.0          | 0 / 3                 |
| Vascular endothelial growth factor A                        | VEGFA                   | P15692                     | CHEMBL1783    | Secreted protein                        | 0.0          | 0 / 3                 |
| Carbonic anhydrase XIV                                      | CA14                    | Q9ULX7                     | CHEMBL3510    | Lyase                                   | 0.0          | 5 / 0                 |
| Heat shock protein 75 kDa, mitochondrial                    | TRAP1                   | Q12931                     | CHEMBL1075132 | Other cytosolic protein                 | 0.0          | 2 / 0                 |
| Heat shock protein HSP 90-alpha                             | HSP90AA1                | P07900                     | CHEMBL3880    | Other cytosolic protein                 | 0.0          | 3 / 0                 |
| Heat shock protein HSP 90-beta                              | HSP90AB1                | P08238                     | CHEMBL4303    | Other cytosolic protein                 | 0.0          | 2 / 0                 |
| Integrin alpha-3                                            | ITGA3                   | P26006                     | CHEMBL3525    | Membrane receptor                       | 0.0          | 3 / 0                 |
| Receptor-type tyrosine-protein phosphatase alpha            | PTPRA                   | P18433                     | CHEMBL3918    | Phosphatase                             | 0.0          | 1 / 0                 |
| Metastin receptor                                           | KISS1R                  | Q969F8                     | CHEMBL5413    | Family A G protein-coupled receptor     | 0.0          | 9 / 0                 |
| Thrombin                                                    | F2                      | P00734                     | CHEMBL204     | Protease                                | 0.0          | 12 / 0                |
| Lysine-specific demethylase 2A                              | KDM2A                   | Q9Y2K7                     | CHEMBL1938210 | Eraser                                  | 0.0          | 1 / 0                 |
| Lysine-specific demethylase 6B                              | KDM6B                   | O15054                     | CHEMBL1938211 | Eraser                                  | 0.0          | 1 / 0                 |
| Stem cell growth factor receptor                            | KIT                     | P10721                     | CHEMBL1936    | Kinase                                  | 0.0          | 0 / 3                 |
| Vascular endothelial growth factor receptor 2               | KDR                     | P35968                     | CHEMBL279     | Kinase                                  | 0.0          | 0 / 4                 |
| Fibroblast growth factor receptor 1                         | FGFR1                   | P11362                     | CHEMBL3650    | Kinase                                  | 0.0          | 0 / 3                 |
| Eukaryotic initiation factor 4A-I                           | EIF4A1                  | P60842                     | CHEMBL2052028 | Hydrolase                               | 0.0          | 0 / 25                |

| Target                                         | Common name | Uniprot ID | ChEMBL ID     | Target Class                        | Probability* | Known actives (3D/2D) |
|------------------------------------------------|-------------|------------|---------------|-------------------------------------|--------------|-----------------------|
| Thymidylate synthase (by homology)             | TYMS        | P04818     | CHEMBL1952    | Transferase                         | 0.0          | 1 / 0                 |
| Nitric oxide synthase, inducible (by homology) | NOS2        | P35228     | CHEMBL4481    | Enzyme                              | 0.0          | 1 / 0                 |
| Retinoid X receptor alpha                      | RXRA        | P19793     | CHEMBL2061    | Nuclear receptor                    | 0.0          | 0 / 12                |
| Estradiol 17-beta-dehydrogenase 1              | HSD17B1     | P14061     | CHEMBL3181    | Enzyme                              | 0.0          | 0 / 1                 |
| Testis-specific androgen-binding protein       | SHBG        | P04278     | CHEMBL3305    | Secreted protein                    | 0.0          | 0 / 1                 |
| Carbonyl reductase [NADPH] 1                   | CBR1        | P16152     | CHEMBL5586    | Enzyme                              | 0.0          | 0 / 1                 |
| Phosphodiesterase 5A                           | PDE5A       | O76074     | CHEMBL1827    | Phosphodiesterase                   | 0.0          | 1 / 0                 |
| Glucagon receptor                              | GCGR        | P47871     | CHEMBL1985    | Family B G protein-coupled receptor | 0.0          | 1 / 0                 |
| Estrogen receptor beta                         | ESR2        | Q92731     | CHEMBL242     | Nuclear receptor                    | 0.0          | 0 / 74                |
| Dynamin-2                                      | DNM2        | P50570     | CHEMBL5812    | Enzyme                              | 0.0          | 1 / 0                 |
| Xanthine dehydrogenase                         | XDH         | P47989     | CHEMBL1929    | Oxidoreductase                      | 0.0          | 1 / 0                 |
| Cytochrome P450 19A1                           | CYP19A1     | P11511     | CHEMBL1978    | Cytochrome P450                     | 0.0          | 2 / 36                |
| Protein kinase C (PKC)                         | PRKCZ       | Q05513     | CHEMBL3438    | Kinase                              | 0.0          | 4 / 0                 |
| Monoamine oxidase B                            | MAOB        | P27338     | CHEMBL2039    | Oxidoreductase                      | 0.0          | 0 / 56                |
| Adenosine A1 receptor (by homology)            | ADORA1      | P30542     | CHEMBL226     | Family A G protein-coupled receptor | 0.0          | 0 / 4                 |
| Adenosine A3 receptor                          | ADORA3      | P0DMS8     | CHEMBL256     | Family A G protein-coupled receptor | 0.0          | 0 / 2                 |
| Multidrug resistance-associated protein 1      | ABCC1       | P33527     | CHEMBL3004    | Primary active transporter          | 0.0          | 1 / 6                 |
| Bcl-2-related protein A1                       | BCL2A1      | Q16548     | CHEMBL6044    | Unclassified protein                | 0.0          | 2 / 0                 |
| Maternal embryonic leucine zipper kinase       | MELK        | Q14680     | CHEMBL4578    | Kinase                              | 0.0          | 14 / 0                |
| DNA polymerase beta (by homology)              | POLB        | P06746     | CHEMBL2392    | Enzyme                              | 0.0          | 0 / 2                 |
| Free fatty acid receptor 1                     | FFAR1       | O14842     | CHEMBL4422    | Family A G protein-coupled receptor | 0.0          | 0 / 63                |
| Beta-galactoside alpha-2,6-sialyltransferase 1 | ST6GAL1     | P15907     | CHEMBL3596075 | Transferase                         | 0.0          | 0 / 2                 |
| Kallikrein 1                                   | KLK1        | P06870     | CHEMBL2319    | Protease                            | 0.0          | 1 / 1                 |

| Target                                    | Common name    | Uniprot ID       | ChEMBL ID     | Target Class      | Probability* | Known actives (3D/2D) |
|-------------------------------------------|----------------|------------------|---------------|-------------------|--------------|-----------------------|
| Kallikrein 2                              | KLK2           | P20151           | CHEMBL2442    | Protease          | 0.0          | 1 / 1                 |
| Integrin alpha-4/<br>beta-1               | ITGB1<br>ITGA4 | P05556<br>P13612 | CHEMBL1907599 | Membrane receptor | 0.0          | 1 / 0                 |
| Pyruvate dehydrogenase kinase isoform 1   | PDK1           | Q15118           | CHEMBL4766    | Kinase            | 0.0          | 5 / 0                 |
| Phospholipase A2 group IIA                | PLA2G2A        | P14555           | CHEMBL3474    | Enzyme            | 0.0          | 0 / 5                 |
| Phospholipase A2 group V                  | PLA2G5         | P39877           | CHEMBL4323    | Enzyme            | 0.0          | 0 / 1                 |
| Group X secretory phospholipase A2        | PLA2G10        | O15496           | CHEMBL4342    | Enzyme            | 0.0          | 0 / 1                 |
| NADH-ubiquinone oxidoreductase chain 4    | MT-ND4         | P03905           | CHEMBL4499    | Oxidoreductase    | 0.0          | 0 / 4                 |
| AMY1C                                     | AMY1A          | P04745           | CHEMBL2478    | Enzyme            | 0.0          | 1 / 0                 |
| Lysine-specific histone demethylase 1     | KDM1A          | O60341           | CHEMBL6136    | Eraser            | 0.0          | 1 / 0                 |
| Phospholipase A2 group 1B                 | PLA2G1B        | P04054           | CHEMBL4426    | Enzyme            | 0.0          | 0 / 1                 |
| FK506-binding protein 1A                  | FKBP1A         | P62942           | CHEMBL1902    | Isomerase         | 0.0          | 1 / 0                 |
| Peptidyl-prolyl cis-trans isomerase FKBP5 | FKBP5          | Q13451           | CHEMBL2052031 | Enzyme            | 0.0          | 1 / 0                 |

**Table S11:** SwissTargetPrediction report obtained using remdesivir as the query molecule

| Target                                                        | Common name            | Uniprot ID                 | ChEMBL ID     | Target Class                        | Probability*    | Known actives (3D/2D) |
|---------------------------------------------------------------|------------------------|----------------------------|---------------|-------------------------------------|-----------------|-----------------------|
| Adenosine A3 receptor                                         | ADORA3                 | P0DMS8                     | CHEMBL256     | Family A G protein-coupled receptor | 0.0822215166115 | 855 / 0               |
| Purinergic receptor P2Y12                                     | P2RY12                 | Q9H244                     | CHEMBL2001    | Family A G protein-coupled receptor | 0.0822215166115 | 55 / 0                |
| Transmembrane domain-containing protein TMIGD3                | TMIGD3                 | P0DMS9                     | CHEMBL3712907 | Unclassified protein                | 0.0822215166115 | 34 / 0                |
| Adenosine A1 receptor                                         | ADORA1                 | P30542                     | CHEMBL226     | Family A G protein-coupled receptor | 0.0822215166115 | 1181 / 0              |
| Acyl-CoA desaturase                                           | SCD                    | O00767                     | CHEMBL5555    | Enzyme                              | 0.0822215166115 | 55 / 0                |
| Phosphodiesterase 10A                                         | PDE10A                 | Q9Y233                     | CHEMBL4409    | Phosphodiesterase                   | 0.0822215166115 | 583 / 0               |
| Cyclin-dependent kinase 5/CDK5 activator 1                    | CDK5R1<br>CDK5         | Q15078<br>Q00535           | CHEMBL1907600 | Kinase                              | 0.0822215166115 | 102 / 0               |
| Cyclin-dependent kinase 2/cyclin A                            | CDK2<br>CCNA1<br>CCNA2 | P24941<br>P78396<br>P20248 | CHEMBL2094128 | Other cytosolic protein             | 0.0822215166115 | 108 / 0               |
| CDK9/ cyclin T1                                               | CDK9<br>CCNT1          | P50750<br>O60563           | CHEMBL2111389 | Other cytosolic protein             | 0.0822215166115 | 40 / 0                |
| Dual-specificity tyrosine-phosphorylation regulated kinase 1A | DYRK1A                 | Q13627                     | CHEMBL2292    | Kinase                              | 0.0822215166115 | 69 / 0                |
| Casein kinase I alpha                                         | CSNK1A1                | P48729                     | CHEMBL2793    | Kinase                              | 0.0822215166115 | 12 / 0                |
| Dual specificity protein kinase CLK1 (by homology)            | CLK1                   | P49759                     | CHEMBL4224    | Kinase                              | 0.0822215166115 | 19 / 0                |
| Insulin-like growth factor I receptor                         | IGF1R                  | P08069                     | CHEMBL1957    | Kinase                              | 0.0822215166115 | 246 / 0               |
| Interleukin-8 receptor B                                      | CXCR2                  | P25025                     | CHEMBL2434    | Family A G protein-coupled receptor | 0.0822215166115 | 178 / 0               |
| Adenosine A2a receptor                                        | ADORA2A                | P29274                     | CHEMBL251     | Family A G protein-coupled receptor | 0.0822215166115 | 896 / 0               |
| Vascular endothelial growth factor receptor 2                 | KDR                    | P35968                     | CHEMBL279     | Kinase                              | 0.0822215166115 | 490 / 0               |
| Cyclin-dependent kinase 2                                     | CDK2                   | P24941                     | CHEMBL301     | Kinase                              | 0.0822215166115 | 226 / 0               |
| Cyclin-dependent kinase 9                                     | CDK9                   | P50750                     | CHEMBL3116    | Kinase                              | 0.0822215166115 | 64 / 0                |
| ADAM17                                                        | ADAM17                 | P78536                     | CHEMBL3706    | Protease                            | 0.0822215166115 | 220 / 0               |
| Geranylgeranyl transferase type I                             | PGGT1B<br>FNNTA        | P53609<br>P49354           | CHEMBL2095164 | Enzyme                              | 0.0822215166115 | 7 / 0                 |
| Cyclin-dependent kinase 2/cyclin E                            | CCNE2<br>CDK2<br>CCNE1 | O96020<br>P24941<br>P24864 | CHEMBL2094126 | Other cytosolic protein             | 0.0822215166115 | 96 / 0                |
| Cathepsin K                                                   | CTSK                   | P43235                     | CHEMBL268     | Protease                            | 0.0822215166115 | 119 / 0               |

| Target                                     | Common name | Uniprot ID | ChEMBL ID  | Target Class                        | Probability*    | Known actives (3D/2D) |
|--------------------------------------------|-------------|------------|------------|-------------------------------------|-----------------|-----------------------|
| PI3-kinase p110-gamma subunit              | PIK3CG      | P48736     | CHEMBL3267 | Enzyme                              | 0.0822215166115 | 307 / 0               |
| Interleukin-1 receptor-associated kinase 4 | IRAK4       | Q9NWZ3     | CHEMBL3778 | Kinase                              | 0.0822215166115 | 98 / 0                |
| Nerve growth factor receptor Trk-A         | NTRK1       | P04629     | CHEMBL2815 | Kinase                              | 0.0822215166115 | 230 / 0               |
| Serine/threonine-protein kinase B-raf      | BRAF        | P15056     | CHEMBL5145 | Kinase                              | 0.0822215166115 | 156 / 0               |
| Cholecystikinin B receptor                 | CCKBR       | P32239     | CHEMBL298  | Family A G protein-coupled receptor | 0.0822215166115 | 88 / 0                |
| GABA receptor alpha-5 subunit              | GABRA5      | P31644     | CHEMBL5112 | Ligand-gated ion channel            | 0.0822215166115 | 136 / 0               |
| Matrix metalloproteinase 13                | MMP13       | P45452     | CHEMBL280  | Protease                            | 0.0822215166115 | 308 / 0               |
| Matrix metalloproteinase 3                 | MMP3        | P08254     | CHEMBL283  | Protease                            | 0.0822215166115 | 167 / 0               |
| Matrix metalloproteinase 9                 | MMP9        | P14780     | CHEMBL321  | Protease                            | 0.0822215166115 | 226 / 0               |
| Matrix metalloproteinase 1                 | MMP1        | P03956     | CHEMBL332  | Protease                            | 0.0822215166115 | 332 / 0               |
| Matrix metalloproteinase 2                 | MMP2        | P08253     | CHEMBL333  | Protease                            | 0.0822215166115 | 257 / 0               |
| Hepatocyte growth factor receptor          | MET         | P08581     | CHEMBL3717 | Kinase                              | 0.0822215166115 | 256 / 0               |
| Matrix metalloproteinase 8                 | MMP8        | P22894     | CHEMBL4588 | Protease                            | 0.0822215166115 | 103 / 0               |
| Epidermal growth factor receptor erbB1     | EGFR        | P00533     | CHEMBL203  | Kinase                              | 0.0822215166115 | 545 / 0               |
| Neurokinin 2 receptor                      | TACR2       | P21452     | CHEMBL2327 | Family A G protein-coupled receptor | 0.0822215166115 | 91 / 0                |
| Sodium/glucose cotransporter 2             | SLC5A2      | P31639     | CHEMBL3884 | Electrochemical transporter         | 0.0822215166115 | 519 / 0               |
| MAP kinase ERK2                            | MAPK1       | P28482     | CHEMBL4040 | Kinase                              | 0.0822215166115 | 370 / 0               |
| ADAM10                                     | ADAM10      | O14672     | CHEMBL5028 | Protease                            | 0.0822215166115 | 16 / 0                |
| PI3-kinase p110-beta subunit               | PIK3CB      | P42338     | CHEMBL3145 | Enzyme                              | 0.0822215166115 | 257 / 0               |
| PI3-kinase p110-alpha subunit              | PIK3CA      | P42336     | CHEMBL4005 | Enzyme                              | 0.0822215166115 | 1130 / 0              |
| ALK tyrosine kinase receptor               | ALK         | Q9UM73     | CHEMBL4247 | Kinase                              | 0.0822215166115 | 76 / 0                |
| Endothelin receptor ET-B                   | EDNRB       | P24530     | CHEMBL1785 | Family A G protein-coupled receptor | 0.0822215166115 | 96 / 0                |
| Endothelin receptor ET-A                   | EDNRA       | P25101     | CHEMBL252  | Family A G protein-coupled receptor | 0.0822215166115 | 160 / 0               |
| Adenosine A2b receptor                     | ADORA2B     | P29275     | CHEMBL255  | Family A G protein-coupled receptor | 0.0822215166115 | 84 / 0                |
| Protein kinase C alpha                     | PRKCA       | P17252     | CHEMBL299  | Kinase                              | 0.0822215166115 | 179 / 0               |
| RAS guanyl                                 | RASGRP3     | Q8IV61     | CHEMBL3638 | Other cytosolic                     | 0.0822215166115 | 50 / 0                |



| Target                                            | Common name    | Uniprot ID       | ChEMBL ID     | Target Class                        | Probability*    | Known actives (3D/2D) |
|---------------------------------------------------|----------------|------------------|---------------|-------------------------------------|-----------------|-----------------------|
| releasing protein 3                               |                |                  |               | protein                             |                 |                       |
| Tyrosine-protein kinase SYK                       | SYK            | P43405           | CHEMBL2599    | Kinase                              | 0.0822215166115 | 600 / 0               |
| Proteasome Macropain subunit                      | PSMB2          | P49721           | CHEMBL3492    | Protease                            | 0.0822215166115 | 4 / 0                 |
| Tyrosine-protein kinase TYK2                      | TYK2           | P29597           | CHEMBL3553    | Kinase                              | 0.0822215166115 | 90 / 0                |
| Matrix metalloproteinase 14                       | MMP14          | P50281           | CHEMBL3869    | Protease                            | 0.0822215166115 | 99 / 0                |
| Matrix metalloproteinase 7                        | MMP7           | P09237           | CHEMBL4073    | Protease                            | 0.0822215166115 | 49 / 0                |
| 26S proteasome                                    | PSMB1          | P20618           | CHEMBL4208    | Protease                            | 0.0822215166115 | 2 / 0                 |
| Proteasome Macropain subunit MB1                  | PSMB5          | P28074           | CHEMBL4662    | Protease                            | 0.0822215166115 | 16 / 0                |
| Phosphodiesterase 5A                              | PDE5A          | O76074           | CHEMBL1827    | Phosphodiesterase                   | 0.0822215166115 | 221 / 0               |
| Serine/threonine-protein kinase mTOR              | MTOR           | P42345           | CHEMBL2842    | Kinase                              | 0.0822215166115 | 966 / 0               |
| Hexokinase type IV                                | GCK            | P35557           | CHEMBL3820    | Enzyme                              | 0.0822215166115 | 139 / 0               |
| Caspase-1 (by homology)                           | CASP1          | P29466           | CHEMBL4801    | Protease                            | 0.0822215166115 | 135 / 0               |
| Matrix metalloproteinase 10                       | MMP10          | P09238           | CHEMBL4270    | Protease                            | 0.0822215166115 | 3 / 0                 |
| Tyrosine kinase non-receptor protein 2            | TNK2           | Q07912           | CHEMBL4599    | Kinase                              | 0.0822215166115 | 92 / 0                |
| Equilibrative nucleoside transporter 1            | SLC29A1        | Q99808           | CHEMBL1997    | Electrochemical transporter         | 0.0822215166115 | 75 / 0                |
| Mammalian target of Rapamycin (mTORC1)            | FKBP1A<br>MTOR | P62942<br>P42345 | CHEMBL2221341 | Kinase                              | 0.0822215166115 | 38 / 0                |
| 3-phosphoinositide dependent protein kinase-1     | PDPK1          | O15530           | CHEMBL2534    | Kinase                              | 0.0822215166115 | 99 / 0                |
| Cathepsin D                                       | CTSD           | P07339           | CHEMBL2581    | Protease                            | 0.0822215166115 | 228 / 0               |
| Cathepsin S                                       | CTSS           | P25774           | CHEMBL2954    | Protease                            | 0.0822215166115 | 97 / 0                |
| Thymidine phosphorylase                           | TYMP           | P19971           | CHEMBL3106    | Enzyme                              | 0.0822215166115 | 3 / 0                 |
| Caspase-8                                         | CASP8          | Q14790           | CHEMBL3776    | Protease                            | 0.0822215166115 | 104 / 0               |
| Beta-secretase 1                                  | BACE1          | P56817           | CHEMBL4822    | Protease                            | 0.0822215166115 | 802 / 0               |
| Mitogen-activated protein kinase kinase kinase 14 | MAP3K14        | Q99558           | CHEMBL5888    | Kinase                              | 0.0822215166115 | 340 / 0               |
| Serotonin 2b (5-HT2b) receptor                    | HTR2B          | P41595           | CHEMBL1833    | Family A G protein-coupled receptor | 0.0822215166115 | 30 / 0                |
| Serine/threonine-protein kinase                   | AURKB          | Q96GD4           | CHEMBL2185    | Kinase                              | 0.0822215166115 | 184 / 0               |

| Target                                                     | Common name   | Uniprot ID       | ChEMBL ID     | Target Class                        | Probability*    | Known actives (3D/2D) |
|------------------------------------------------------------|---------------|------------------|---------------|-------------------------------------|-----------------|-----------------------|
| Aurora-B                                                   |               |                  |               |                                     |                 |                       |
| Dual specificity mitogen-activated protein kinase kinase 1 | MAP2K1        | Q02750           | CHEMBL3587    | Kinase                              | 0.0822215166115 | 197 / 0               |
| Serine/threonine-protein kinase Aurora-A                   | AURKA         | O14965           | CHEMBL4722    | Kinase                              | 0.0822215166115 | 280 / 0               |
| Glyceraldehyde-3-phosphate dehydrogenase liver             | GAPDH         | P04406           | CHEMBL2284    | Oxidoreductase                      | 0.0822215166115 | 10 / 0                |
| Tyrosine-protein kinase ITK/TSK                            | ITK           | Q08881           | CHEMBL2959    | Kinase                              | 0.0822215166115 | 78 / 0                |
| Cyclin-dependent kinase 1                                  | CDK1          | P06493           | CHEMBL308     | Kinase                              | 0.0822215166115 | 223 / 0               |
| Interleukin-8 receptor A                                   | CXCR1         | P25024           | CHEMBL4029    | Family A G protein-coupled receptor | 0.0822215166115 | 51 / 0                |
| DNA polymerase alpha subunit                               | POLA1         | P09884           | CHEMBL1828    | Transferase                         | 0.0822215166115 | 3 / 0                 |
| Cyclin-dependent kinase 2/cyclin E1                        | CCNE1<br>CDK2 | P24864<br>P24941 | CHEMBL1907605 | Kinase                              | 0.0822215166115 | 85 / 0                |
| Arachidonate 5-lipoxygenase                                | ALOX5         | P09917           | CHEMBL215     | Oxidoreductase                      | 0.0822215166115 | 94 / 0                |
| Tyrosine-protein kinase SRC                                | SRC           | P12931           | CHEMBL267     | Kinase                              | 0.0822215166115 | 246 / 0               |
| Phosphodiesterase 4D                                       | PDE4D         | Q08499           | CHEMBL288     | Phosphodiesterase                   | 0.0822215166115 | 53 / 0                |
| Cyclin-dependent kinase 5/CDK5 activator 1                 | CDK5          | Q00535           | CHEMBL4036    | Kinase                              | 0.0822215166115 | 47 / 0                |
| Sodium channel protein type IX alpha subunit               | SCN9A         | Q15858           | CHEMBL4296    | Voltage-gated ion channel           | 0.0822215166115 | 245 / 0               |
| Tyrosine-protein kinase JAK3                               | JAK3          | P52333           | CHEMBL2148    | Kinase                              | 0.0822215166115 | 195 / 0               |
| Tyrosine-protein kinase JAK1                               | JAK1          | P23458           | CHEMBL2835    | Kinase                              | 0.0822215166115 | 171 / 0               |
| Tyrosine-protein kinase JAK2                               | JAK2          | O60674           | CHEMBL2971    | Kinase                              | 0.0822215166115 | 314 / 0               |
| Matrix metalloproteinase 12                                | MMP12         | P39900           | CHEMBL4393    | Protease                            | 0.0822215166115 | 31 / 0                |
| Sodium/glucose cotransporter 1                             | SLC5A1        | P13866           | CHEMBL4979    | Electrochemical transporter         | 0.0822215166115 | 145 / 0               |
| Tyrosine-protein kinase FYN                                | FYN           | P06241           | CHEMBL1841    | Kinase                              | 0.0822215166115 | 16 / 0                |
| Complement factor D                                        | CFD           | P00746           | CHEMBL2176771 | Protease                            | 0.0822215166115 | 125 / 0               |
| HERG                                                       | KCNH2         | Q12809           | CHEMBL240     | Voltage-gated ion channel           | 0.0822215166115 | 277 / 0               |
| MAP kinase p38 alpha (by                                   | MAPK14        | Q16539           | CHEMBL260     | Kinase                              | 0.0822215166115 | 384 / 0               |

| Target                                                           | Common name                                         | Uniprot ID                                               | ChEMBL ID     | Target Class                | Probability*    | Known actives (3D/2D) |
|------------------------------------------------------------------|-----------------------------------------------------|----------------------------------------------------------|---------------|-----------------------------|-----------------|-----------------------|
| homology)                                                        |                                                     |                                                          |               |                             |                 |                       |
| Cyclin-dependent kinase 4                                        | CDK4                                                | P11802                                                   | CHEMBL331     | Kinase                      | 0.0822215166115 | 154 / 0               |
| Acetyl-coenzyme A transporter 1                                  | SLC33A1                                             | O00400                                                   | CHEMBL3638338 | Electrochemical transporter | 0.0822215166115 | 65 / 0                |
| Transient receptor potential cation channel subfamily A member 1 | TRPA1                                               | O75762                                                   | CHEMBL6007    | Voltage-gated ion channel   | 0.0822215166115 | 9 / 0                 |
| Gamma-secretase                                                  | PSEN2<br>PSENEN<br>NCSTN<br>APH1A<br>PSEN1<br>APH1B | P49810<br>Q9NZ42<br>Q92542<br>Q96BI3<br>P49768<br>Q8WW43 | CHEMBL2094135 | Protease                    | 0.0822215166115 | 94 / 0                |
| Cyclin-dependent kinase 7/ cyclin H                              | CDK7<br>CCNH                                        | P50613<br>P51946                                         | CHEMBL2111288 | Other cytosolic protein     | 0.0822215166115 | 46 / 0                |
| PI3-kinase p110-delta subunit                                    | PIK3CD                                              | O00329                                                   | CHEMBL3130    | Enzyme                      | 0.0822215166115 | 250 / 0               |
